# When do opposites attract? A model uncovering the evolution of disassortative mating

*Manuscript elements:* Figure 1, Figure 2, Figure 3, Table 1, Table 2, online appendices A and B (including Figure B1 and Figure B2). Figure 1, Figure 2, Figure 3, Figure B1 and Figure B2 are to print in color.

*Keywords:* sexual selection, mate choice, genetic load, self referencing, theory.

*Manuscript type:* Article.

## Abstract

2 Disassortative mating is a rare form of mate preference that promotes the persistence  
of polymorphism. While the evolution of assortative mating, and its consequences on  
4 trait variation and speciation have been extensively studied, the conditions enabling the  
evolution of disassortative mating are still poorly understood. Mate preferences increase  
6 the risk of missing mating opportunities, a cost that can be compensated by a greater  
fitness of offspring. Heterozygote advantage should therefore promote the evolution of  
8 disassortative mating, which maximizes the number of heterozygous offspring. From the  
analysis of a two-locus diploid model, with one locus controlling the mating cue under  
10 viability selection and the other locus coding for the level of disassortative preference, we  
show that heterozygote advantage and negative frequency-dependent viability selection  
12 acting at the cue locus promote the fixation of disassortative preferences. The condi-  
tions predicted to enable the evolution of disassortative mating in our model match the  
14 selection regimes acting on traits subject to disassortative mating behavior in the wild.  
In sharp contrast with the evolution of assortative preferences, we also show that dis-  
16 assortative mating generates a negative frequency-dependent sexual selection, which in  
turn disadvantages heterozygotes at the cue locus, limiting the evolution of disassorta-  
18 tive preferences. This negative feedback loop could explain why this behavior is rare in  
natural populations.

20

## Introduction

The evolution of mate preferences is puzzling because preferences increase the risk of  
22 missing mating opportunities, which may incur significant fitness costs. While the evolution of assortative mating has been reported in many species, disassortative mating  
24 is more scarcely observed (Janicke et al., 2019; Jiang et al., 2013), suggesting that the ecological conditions enabling its evolution could be more restrictive. Here we build a  
26 general approach aiming at investigating the selection regimes allowing the evolution of disassortative mating using a mathematical model.

28 The multiple costs associated with mate choice tend to generate direct selection against the evolution of mate preferences (see (Pomiankowski, 1987) for a review), and  
30 may further limit the evolution of disassortative mating (see (Kopp and Hermisson, 2008; Otto et al., 2008; Pomiankowski, 1987; Schneider and Bürger, 2006) for theoretical studies). These costs of choosiness are generally separated into fixed and relative costs (Otto et al., 2008). Relative costs depend on the distribution of the mating cue within population.  
34 For example, relative costs of choosiness may emerge from the increased investment in mate searching, because an individual needs to investigate several mates to find  
36 a suitable one. Increased sampling effort can be costly in time Kruijt and Hogan (1967), in energy (as empirically estimated in antilopes Byers et al. (2005)) and may enhance  
38 predation risk, for instance in patrolling animals Hughes et al. (2012). Evaluation effort increases with the proportion of unpreferred males, implying growing relative costs of  
40 choosiness when the preferred cue is rarely displayed in the population. In addition, mate rejection by choosy individuals can also incur relative fitness costs, as in the case of  
42 males harassment: in the fly species *Musca domestica*, males jump on females' back to ini-

44 tiate mating and choosy females have to kick unpreferred males to avoid mating (Sacca,  
1964). The number of males to kick out decreases with the proportion of preferred males.  
By contrast, fixed costs associated with mate choice do not depend on the composition  
46 of the population. For instance, metabolic costs may emerge from the mechanisms un-  
derlying mate choice, requiring specialized morphological, physiological and cognitive  
48 changes (see Rosenthal (2017) for a review). For example, in the self-incompatibility sys-  
tem in the genus *Brassica*, mate choice involves a specialized receptor-ligand association  
50 (Hiscock and McInnis, 2003), so that the evolution of self-incompatibility is associated  
with metabolic costs induced by the production of the specific proteins.

52 Despite these costs, mate choice is ubiquitous in nature (Backwell and Passmore,  
1996; Barrett, 1990; Cisar, 1999; Hiscock and McInnis, 2003; Jiggins et al., 2001; Mer-  
54 rill et al., 2014; Savolainen et al., 2006) indicating that mate preference evolves readily  
and that choosy individuals enjoy benefits compensating those costs. Choosy individ-  
56 uals may enjoy direct benefits (Wagner, 2011) (for instance through beneficial sexually  
transmitted microbes (Smith and Mueller, 2015), or by decreasing risk of pre-copulatory  
58 cannibalism (Pruitt and Riechert, 2009)), as well as indirect benefits associated with mate  
preferences through an enhanced quality of their offspring (Byers and Waits, 2006; Drick-  
60 amer et al., 2000; Jiggins et al., 2001; Petrie, 1994; Sheldon et al., 1997; Welch et al., 1998).

Viability selection acting on mating cues, by generating indirect selection on prefer-  
62 ences, may thus promote their evolution (Fisher, 1930). Such indirect selection is caused  
by genetic associations between mating preference and mating cues (linkage disequili-  
64 birum) (Barton and Turelli, 1991; Ewens, 1979; Kirkpatrick and Ravigné, 2002), generated  
during zygote formation because of mate preferences. The indirect effect of viability  
66 selection, that acts directly on mating cues, on the evolution of mate preferences, first

identified by Fisher, has now been confirmed in many theoretical studies (Barton and  
68 Turelli, 1991; Heisler, 1984; O'Donald, 1980a). Preference based on a selectively neutral  
mating cue may also evolve if the cue is correlated with an adaptive trait due to link-  
70 age disequilibrium between preference and an adaptive trait (Heisler, 1985). A growing  
number of empirical evidence showing that female choice does improve offspring fitness  
72 is reported (Byers and Waits, 2006; Drickamer et al., 2000; Petrie, 1994; Sheldon et al.,  
1997; Welch et al., 1998), suggesting that preferences generate linkage disequilibria be-  
74 tween preference alleles and other combinations of alleles favored by viability selection.  
The indirect selection may thus be a major driver of the evolution of mate choice.

76 Once mate preferences are established in the population, they generate sexual se-  
lection on the traits exhibited by individuals during courtship, that may drive the evo-  
78 lution of extravagant traits in males, following a Fisherian runaway (Fisher, 1930; Go-  
mulkiewicz and Hastings, 1990; Greenspoon and Otto, 2009; Kirkpatrick, 1982; Lande,  
80 1981; O'Donald, 1980b; Otto, 1991; Veller et al., 2020). The evolution of mate preferences  
thus involves complex evolutionary processes where preferences co-evolve with the cues  
82 displayed by the chosen individuals. This co-evolution has been observed in natural  
populations (Grace and Shaw, 2011; Higginson et al., 2012) and in experimental studies  
84 (Brooks and Couldridge, 1999; Miller and Pitnick, 2002), underpinning the importance  
of sexual selection feedbacks on the evolution of mate preferences.

86 The different selection regimes acting on mating cues can therefore drive the evo-  
lution of different mating patterns, through indirect selection. Disruptive selection on  
88 mating cue, has been demonstrated to promote assortative preferences (Bank et al., 2012;  
de Cara et al., 2008; Dieckmann, 2004; Gavrillets, 2004; Kirkpatrick, 2000; Otto et al.,  
90 2008). By contrast, selection conferring fitness advantages to intermediate phenotypes

is often thought to promote disassortative mating (Kirkpatrick and Nuismer, 2004; Kondrashov and Shpak, 1998). Nevertheless, the selection regimes enabling the evolution of disassortative mating are much less studied than the selective pressures involved in the evolution of assortative mating, extensively investigated in the context of speciation (Gavrilets, 2004; Kopp et al., 2018).

Disassortative mating has been documented only in a few cases. The best documented cases are the MHC loci in humans and mice, where females prefer males with a genotype different from their own (Wedekind et al., 1995). MHC genes are involved in specific recognition of pathogens, and host-pathogens interactions classically generate negative frequency dependent selection and/or heterozygote advantage (recognition of a larger range of pathogens) (Piertney and Oliver, 2006). Such balancing selection regimes are thought to promote disassortative mating at MHC loci (Ihara and Feldman, 2003; Penn and Potts, 1999; Slade and McCallum, 1992). Using numerical simulations in a haploid model, Howard and Lively (2003, 2004) confirm that host-pathogens interactions at MHC loci promote the emergence of disassortative mating, although they never observed the fixation of this mating behavior in the population. In a more general model, Nuismer et al. (2008) observe that sexual selection due to non-random mating generates indirect selection on preference that hampers the fixation of disassortative mating in the population. Despite this limitation, the frequency of disassortative mating can be high when viability selection strongly promotes this behavior. In an extension of Nuismer et al. (2008)'s model, Greenspoon and M'Gonigle (2014) show that maternal transmission of pathogens leads to higher levels of disassortative mating because mothers have increased fitness when they produce offsprings with MHC genotypes different from their own, that might be more effective in eliminating transmitted pathogens.

Other cases of disassortative mating in traits unlinked to immune functions have  
116 been reported, such as disassortative mating based on the plumage coloration in the  
white throated sparrow (Throneycroft, 1975), or on the wing color pattern in the mimetic  
118 butterfly *Heliconius numata* (Chouteau et al., 2017). In both cases, one cue allele is linked  
to a genetic load (Jay et al., 2019; Tuttle et al., 2016), so that disassortative mating may  
120 increase offspring fitness through an increased viability of heterozygotes. In both cases,  
cue alleles associated with a genetic load are dominant to other alleles, suggesting that  
122 dominance among cue alleles may play a role in the evolution of disassortative mating.  
Numerical simulations designed from the specific case of *Heliconius numata*, confirm that  
124 heterozygote advantage at the locus controlling color pattern variation may promote the  
emergence of disassortative mating (Maisonneuve et al., 2019).

126 Other theoretical studies have focused on the effect of disassortative mating on the  
persistence of variations at the cue locus, illustrating that this mate preference may limit  
128 the purging of maladaptive cue alleles, and therefore promotes higher levels of polymor-  
phism at the cue locus (Falk and Li, 1969; Ihara and Feldman, 2003; Karlin and Feldman,  
130 1968), and in turn, maintains conditions favoring this mate preference. These results  
suggest that the evolution of disassortative preferences is likely to depend on viability  
132 selection acting at the cue locus but also on feedbacks between cue polymorphism and  
mate choice. This is now calling for a mathematical framework providing general pre-  
134 dictions on the selection regimes enabling the emergence of disassortative mating and  
highlighting the feedback of sexual selection on the evolution of disassortative mating  
136 when this behavior is common.

We therefore analytically explore the conditions enabling the evolution of disassorta-  
138 tive mating by adapting a previous model of evolution of assortative mating developed

by Otto et al. (2008). The model assumes a population of diploid individuals with two  
140 key loci: the first locus  $C$  controls variation in a single mating cue, that may be sub-  
ject to viability selection. The second locus  $P$  controls mate preference based on the  
142 cues encoded by locus  $C$ . We take into account fixed and relative costs associated with  
choosiness. Contrary to the original model built to understand the evolution of assorta-  
144 tive mating, alleles at preference locus  $P$  generate disassortative preference. Moreover,  
we introduce coefficients that describe the dominance at both loci to identify how the  
146 dominance relationships impact the evolution of disassortative mating.

We first analyze the model under a Quasi-linkage Equilibrium (QLE) to derive an-  
148 alytic expressions of changes in genetic frequency at both the cue and preference loci,  
providing general expectations on the conditions enabling the emergence and persistence  
150 of disassortative mating. We then use numerical simulations to explore the evolution of  
disassortative preferences under strong overdominant selection acting at the cue locus,  
152 that does not match the QLE assumptions. We finally compare our theoretical predictions  
with the few documented cases of disassortative mating and discuss why the evolution  
154 of disassortative mating may be limited in natural populations.

## Methods

156 Following the theoretical framework developed by Otto et al. (2008), we investigate the  
evolution of disassortative mating by assuming a diploid sexual species with balanced  
158 sex ratio, and considering two loci  $C$  and  $P$ . The locus  $C$  controls for a trait used as a  
mating cue and the locus  $P$  for the mate preference. We consider two different alleles,  $a$   
160 and  $b$ , at locus  $C$  so that  $\mathcal{G}_C = \{aa, ab, bb\}$  is the set of possible genotypes at this locus.  
This locus  $C$  can be under different viability selection regimes. At the mating preference



162 locus  $P$ , we assume two alleles: a resident allele  $M$  and a mutant allele  $m$ . The set of  
possible genotypes at locus  $P$  is thus  $\mathcal{G}_P = \{MM, Mm, mm\}$ . The two loci recombine  
164 with probability  $r$  at each birth event. We consider a discrete time model and follow the  
genotypes frequencies over time.

### 166 *Mating cue locus under viability selection*

Dominance between the cue alleles  $a$  and  $b$  is controlled by the *dominance coefficient* at  
168 locus  $C$ ,  $h_a$ . This coefficient describes the dominance of the focal allele  $a$ : if  $h_a = 0$  alleles  
 $a$  and  $b$  are codominant and if  $h_a = 1$  (resp.  $-1$ ) the focal allele  $a$  is dominant (resp.  
170 recessive) to  $b$ . If  $0 < h_a < 1$  (resp.  $-1 < h_a < 0$ ) allele  $a$  is incompletely dominant (resp.  
recessive) to  $b$ .

172 The cue induced by the genotype at locus  $C$  determines mating success but can also  
be under viability selection. We explore the evolution of disassortative mating under  
174 different viability selective regimes acting on the mating cues, specifically focusing on  
balancing selection regimes promoting polymorphism at locus  $C$ .

176 Let  $f(i, k)$  be the frequency of genotype  $(i, k) \in \mathcal{G}_C \times \mathcal{G}_P$ . We introduce a selection  
coefficient  $S_i(f, h_a)$  acting on genotype  $i \in \mathcal{G}_C$ , which may vary depending on genotypic  
178 frequencies at locus  $C$  and dominance between alleles  $a$  and  $b$ . This allows exploring dif-  
ferent regimes of balancing selection, including negative frequency-dependent selection,  
180 that can favor polymorphism at locus  $C$ . Let  $w_i$  be the fitness of genotype  $i$  resulting  
from viability selection acting at locus  $C$

$$182 \quad w_i := 1 + S_i(f, h_a).$$

We assume that viability selection generating changes in genotype frequencies at locus

184  $C$  acts before reproduction. As a consequence, the changes in frequencies due to sexual  
selection depend on the frequencies at locus  $C$  after viability selection, described below.

186 For  $(i, k) \in \mathcal{G}_C \times \mathcal{G}_P$ :

$$f'_{i,k} = \frac{w_i}{\bar{w}} f_{i,k},$$

188 with

$$\bar{w} = \sum_{i \in \mathcal{G}_C} w_i \left( \sum_{k \in \mathcal{G}_P} f_{i,k} \right),$$

190 being the average fitness of the females.

### *Mate choice and reproduction*

192 Reproduction depends on the mating cues controlled by locus  $C$ , but also on mate preferences controlled by locus  $P$ . Each genotype  $k \in \mathcal{G}_P$  is associated with a coefficient  $\rho_k$ ,  
194 which quantifies how much a female of genotype  $k$  tends to reject males with the same cue as her own (*i.e.* the strength of disassortative preference of females). The values of  
196  $\rho_{MM}$  and  $\rho_{mm}$  are fixed. For the genotype  $Mm$ , we introduce a dominance coefficient  $h_m$  at locus  $P$ . Similarly to the dominance at locus  $C$ , this coefficient  $h_m$  in  $[-1, 1]$  describes  
198 the dominance of the mutant allele  $m$ , with the following rule:

$$\rho_{Mm} = \frac{1 - h_m}{2} \rho_{MM} + \frac{1 + h_m}{2} \rho_{mm}. \quad (1)$$

200

We assume females to be the choosy sex (de Cara et al., 2008; Gavrilets and Boake,  
202 1998; Kopp and Hermisson, 2008; Lande, 1981; Otto et al., 2008), so that males can mate with any accepting females. We assume a balanced sex-ratio and consider that the frequencies of females and males with genotype  $i$  are equal (de Cara et al., 2008; Gavrilets and Boake, 1998; Otto et al., 2008).

206 To quantify the mating probability between two individuals we introduce the prefer-  
 ence matrix  $Pref(\rho_k), k \in \mathcal{G}_P$ , defined by:

$$208 \quad Pref(\rho_k) = \begin{pmatrix} & aa & ab & bb \\ \begin{matrix} 1 - \rho_k & 1 - \frac{1+h_a}{2}\rho_k & 1 \\ 1 - \frac{1+h_a}{2}\rho_k & 1 - \rho_k & 1 - \frac{1-h_a}{2}\rho_k \\ 1 & 1 - \frac{1-h_a}{2}\rho_k & 1 - \rho_k \end{matrix} & \begin{matrix} aa \\ ab \\ bb \end{matrix} \end{pmatrix}, \quad (2)$$

where for  $(i, j) \in \mathcal{G}_C^2, k \in \mathcal{G}_P$ ,  $Pref_{ij}(\rho_k)$  measures the strength of preference of female  $i$   
 210 with genotype  $k$  at locus  $P$  for male  $j$ . With the help of this preference matrix describing  
 disassortative mating behavior in the framework of Otto et al. (2008) (initially designed to  
 212 explore the evolution of assortative mating), we investigate the evolution of disassortative  
 mating.

214 For  $(i, k) \in \mathcal{G}_C \times \mathcal{G}_P$ , we define  $T_{i,k}$  as the probability that a female of genotype  $(i, k)$   
 accepts a male during a mating encounter:

$$216 \quad T_{i,k} = \sum_{j \in \mathcal{G}_C} Pref_{ij}(\rho_k) p'_j, \quad (3)$$

218 with

$$p'_j := \sum_{l \in \mathcal{G}_P} f'_{j,l} \quad (4)$$

220 being the proportion of genotype  $j$  at the cue locus  $C$  in the population after the viability  
 selection step.

222 Choosy females of genotype  $k$  at locus  $P$  are assumed to pay a fixed cost  $c_f \rho_k$  for their  
 choosiness (the choosier a female is, the higher is this cost), that accounts for a greater

224 investment in the search or rejection of mates. Mating behavior is indeed thought to be  
 more costly for choosy females than for females mating with the first male encountered,  
 226 regardless of displayed cue. Choosy females also pay a relative cost of choosiness, de-  
 pending on the proportion of preferred males and on a coefficient  $c_r \in [0, 1]$ . This relative  
 228 cost is small if the preferred mates are abundant in the population. When a female rejects  
 a given male because he displays an unpreferred cue, she can still accept another mate  
 230 with probability  $1 - c_r$ .

We define the fertility of a female of genotype  $(i, k) \in \mathcal{G}_C \times \mathcal{G}_P$  as

$$232 \quad F_{i,k} = (1 - c_r + c_r T_{i,k})(1 - c_f \rho_k). \quad (5)$$

The average fertility in the population is thus:

$$234 \quad \bar{F} = \sum_{(i,k) \in \mathcal{G}_C \times \mathcal{G}_P} f'_{i,k} F_{i,k}. \quad (6)$$

Then changes in genotypes frequencies after reproduction are as follows. For  $(i', k') \in$   
 236  $\mathcal{G}_C \times \mathcal{G}_P$ :

$$f''_{i',k'} = \sum_{(i,k) \in \mathcal{G}_C \times \mathcal{G}_P} \left( f'_{i,k} \frac{F_{i,k}}{\bar{F}} \sum_{(j,l) \in \mathcal{G}_C \times \mathcal{G}_P} \text{coef}_{i',k',i,k,j,l,r} \frac{\text{Pref}_{ij}(\rho_k) f'_{j,l}}{T_{i,k}} \right), \quad (7)$$

238 where *coef* controls the Mendelian segregation of alleles during reproduction between  
 the choosing individual of genotype  $i$  at locus  $C$  and  $k$  at locus  $P$  and a chosen individual  
 240 of genotype  $j$  at locus  $C$  and  $l$  at locus  $P$ , determining his displayed cue. The Mendelian  
 segregation also depends on the recombination probability  $r$  between the cue locus  $C$   
 242 and the preference locus  $P$ . All variables and parameters used in the model are summed  
 up in Table 1.

| Abbreviation    | Description                                                                                                                                                                                                                                 |
|-----------------|---------------------------------------------------------------------------------------------------------------------------------------------------------------------------------------------------------------------------------------------|
| $\mathcal{G}_C$ | Set of possible genotypes at locus C: $\mathcal{G}_C = \{aa, ab, bb\}$                                                                                                                                                                      |
| $\mathcal{G}_P$ | Set of possible genotypes at locus P: $\mathcal{G}_P = \{MM, Mm, mm\}$                                                                                                                                                                      |
| $f_{i,k}$       | Frequency of genotype $(i, k)$ in the population, $(i, k) \in \mathcal{G}_C \times \mathcal{G}_P$                                                                                                                                           |
| $f'_{i,k}$      | Frequency of genotype $(i, k)$ in the population after viability selection, $(i, k) \in \mathcal{G}_C \times \mathcal{G}_P$                                                                                                                 |
| $f''_{i,k}$     | Frequency of genotype $(i, k)$ in the population after reproduction, $(i, k) \in \mathcal{G}_C \times \mathcal{G}_P$                                                                                                                        |
| $p_a$           | Proportion of allele $a$ at locus C in the population (with $a \in \{a, b\}$ ).                                                                                                                                                             |
| $p_m$           | Proportion of allele $m$ at locus P in the population (with $m \in \{m, M\}$ ).                                                                                                                                                             |
| $r$             | Recombination probability between the loci C and P.                                                                                                                                                                                         |
| $\rho_k$        | Strength of disassortative mating within a female of genotype $k \in \mathcal{G}_P$ at locus P as described in the preference matrix (2).                                                                                                   |
| $h_a/h_m$       | Dominance coefficient at locus C describing the dominance of allele $a/m$ .                                                                                                                                                                 |
| $S_i(f, h_a)$   | Viability selection coefficient when the allele frequencies are $f$ and the dominance coefficient at locus C is $h_a$ .                                                                                                                     |
| $c_f/c_r$       | Fixed/relative cost of choosiness.                                                                                                                                                                                                          |
| $D_C$           | Genetic diversity at locus C, $D_C = p_a p_b$ .                                                                                                                                                                                             |
| $D_P$           | Genetic diversity at locus P, $D_P = p_m p_M$ .                                                                                                                                                                                             |
| $p_{he}^{HW}$   | Proportion of heterozygotes at the Hardy-Weinberg equilibrium, $p_{he}^{HW} = 2p_a p_b$                                                                                                                                                     |
| $p_{ho}^{HW}$   | Proportion of homozygotes at the Hardy-Weinberg equilibrium, $p_{ho}^{HW} = p_a^2 + p_b^2$                                                                                                                                                  |
| $H_{ns}/H_{ss}$ | Heterozygote advantage due to viability/sexual selection.                                                                                                                                                                                   |
| $H$             | Heterozygote advantage.                                                                                                                                                                                                                     |
| $\bar{\rho}$    | Average strength of disassortative mating in the population.                                                                                                                                                                                |
| $\Delta_\rho$   | Effect of allele $m$ on the level of disassortative mating in the population.                                                                                                                                                               |
| $D_{am}$        | Linkage disequilibrium between alleles $a$ and $m$ within chromosome (cis). $D_{am} = p_{am} - p_a p_m$ , where $p_{am}$ is the proportion of the association between alleles $a$ and $m$ within the chromosome.                            |
| $D_{a,m}$       | Linkage disequilibrium between alleles $a$ and $m$ between homologous chromosomes (trans). $D_{a,m} = p_{a,m} - p_a p_m$ , where $p_{a,m}$ is the proportion of the association between alleles $a$ and $m$ between homologous chromosomes. |
| $D_{he}$        | Excess of heterozygotes at locus C, $D_{he} = 1 - p_{aa}^2 - p_{bb}^2$ .                                                                                                                                                                    |
| $D_{he,m}$      | Trigenic disequilibrium measuring the association between allele $m$ and the excess of heterozygotes at locus C.                                                                                                                            |
| $\delta$        | Fitness reduction in homozygotes in numerical simulations.                                                                                                                                                                                  |
| $\mu$           | Asymmetry in viability selection acting on the two homozygous genotypes in numerical simulations.                                                                                                                                           |

Table 1: Description of variables and parameters used in the model.

244

## *Model exploration*

### *QLE approximation exploring the evolution of weak disassortative preference*

246 We use the QLE analysis results presented in a previous model of evolution of assortative  
mating (see Appendix B in (Otto et al., 2008)). This approach is valid when the selection  
248 coefficients, the strength of choosiness as well as costs of assortment are small; namely,  
for all  $(i, f, h_a) \in \mathcal{G}_C \times \mathcal{F}_{C,P} \times [0, 1]$  (where  $\mathcal{F}_{C,P}$  denotes the space of frequencies on  $\mathcal{G}_C \times$   
250  $\mathcal{G}_P$ ) and  $k$  in  $\mathcal{G}_P$ ,  $S_i(f, h_a)$ ,  $\rho_k$ ,  $c_r$  and  $c_f$  are of order  $\epsilon$  with  $\epsilon$  small. Under this hypothesis  
the genetic association (linkage disequilibria and departures from Hardy-Weinberg) are  
252 small (of order  $\epsilon$ ). This approach allows to obtain mathematical expressions of allele  
frequency changes at the cue and preference loci from the Hardy-Weinberg equilibrium.  
254 This method highlights the key evolutionary mechanisms shaping the evolution of allele  
frequencies at these loci. In particular, we assume that the mutant allele  $m$  increases  
256 disassortative preference (*i.e.*  $\rho_{mm} > \rho_{MM}$ ), and investigate the evolutionary forces acting  
on this allele. The QLE approximation assumes a weak viability selection at the cue locus  
258  $C$  and is mostly relevant to explore the evolution of weak tendency to disassortative  
mating (low values of  $\rho$ ).

### *Numerical simulations*

We then use numerical simulations to explore the evolutionary stable level of strength of  
262 disassortative mating when the hypothesis of weak selection is relaxed. We specifically  
focus on a realistic case of viability selection promoting polymorphism at the cue locus,  
264 assuming overdominance. We explore the effect of variations in key parameters, in the  
range where the QLE analysis is not relevant.

266 To explore the evolution of disassortative mating acting on the cue locus submitted to  
overdominance, we model a viability selection regime favoring heterozygotes. We thus  
268 set the selection coefficients associated with the different genotypes at the cue locus as:

$$S_{aa} = -\frac{1+\mu}{2}\delta, \quad S_{ab} = 0 \quad \text{and} \quad S_{bb} = -\frac{1-\mu}{2}\delta, \quad (8)$$

270 where  $\delta$  is the fitness reduction in homozygotes and  $\mu$  is the asymmetry in viability  
selection acting on the two homozygous genotypes. If  $\mu = 1$  (resp.  $-1$ ), the disadvantage  
272 is applied to genotype  $aa$  (resp.  $bb$ ) only, and if  $\mu = 0$  the disadvantage is the same for  
both homozygotes. To study the evolutionary stable level of strength of disassortative  
274 mating, we numerically compute the invasion gradient. First we consider a population  
without mutant ( $p_m = 0$ ), for each value of the strength of disassortative mating of the  
276 resident  $\rho_{MM}$ , we let the initial population evolve until the genotype frequencies at the  
cue locus  $C$  reach equilibrium. At equilibrium, we introduce the mutant allele  $m$  with an  
278 initial 0.01 frequency. We call  $\Delta^{100}p_m$  the change in the mutant frequency after hundred  
generations. We then numerically estimate

$$280 \quad D(\rho_{MM}) = \frac{\partial \Delta^{100}p_m}{\partial \rho_{mm}}. \quad (9)$$

The evolutionary stable level of strength of disassortative mating is the value  $\rho$  for which  
282  $D(\rho) = 0$ .

We explore the effect of variations of each of the key parameters ( $\delta$ ,  $h_a$ ,  $\mu$ ,  $c_f$  and  $c_r$ )  
284 using independent simulations. The default values for the remaining parameters follow  
the assumptions: codominance at cue locus  $h_a = 0$ ,  $\delta = 1$ , pure symmetry in viability  
286 selection  $\mu = 0$  and low cost of choosiness  $c_f = c_r = 0.005$ . We assume no recombination  
 $r = 0$  and codominance at preference locus  $h_m = 0$ .

288

## Results

### *Sexual selection at the cue locus generated by disassortative mating*

290 Following the QLE approach (*i.e.* assuming that terms of the form  $S_i(f, h_a)$ ,  $\rho_k$ ,  $c_r$  and  $c_f$   
 are of order  $\epsilon$  and  $\epsilon$  is small (see Section Methods)), the change in frequency of allele  $a$   
 292 at the locus  $C$  controlling mating cue is (see Eq. (B2a) in (Otto et al., 2008)):

$$\Delta p_a = \overbrace{D_C(p_a(S_{aa}(f, h_a) - S_{ab}(f, h_a)) + p_b(S_{ab}(f, h_a) - S_{bb}(f, h_a)))}^{\text{Effect of viability selection}} + \underbrace{\bar{\rho}(1 + c_r)D_C((p_b^4 - p_a^4)/4 + h_a(P_{ho}^{HW} - 2P_{he}^{HW})/4)}_{\text{Effect of sexual selection and opportunity cost}} + O(\epsilon^2), \quad (10)$$

296 where  $D_C = p_a p_b$  is the genetic diversity at locus  $C$ ,

$$\bar{\rho} = p_M^2 \rho_{MM} + 2p_M p_m \rho_{Mm} + p_m^2 \rho_{mm},$$

298 is the average disassortative mate preference at locus  $P$ ,

$$P_{he}^{HW} = 2p_a p_b \quad \text{and} \quad P_{ho}^{HW} = p_a^2 + p_b^2 \quad (11)$$

300 are respectively the proportion of heterozygotes and homozygotes at the Hardy-Weinberg  
 equilibrium. Under the QLE assumption the departure from the Hardy-Weinberg equi-  
 302 librium is small, hence the proportions of heterozygotes and homozygotes are close to  
 $P_{he}^{HW}$  and  $P_{ho}^{HW}$ .

304

Eq. (10) highlights that the dynamics of the mating cue allele  $a$  can be affected by vi-  
 306 ability and sexual selections on males and relative cost of choosiness impacting females.  
 Contrary to assortative mating that generates positive frequency-dependent sexual selec-  
 308 tion, disassortative preferences generate negative frequency-dependent sexual selection



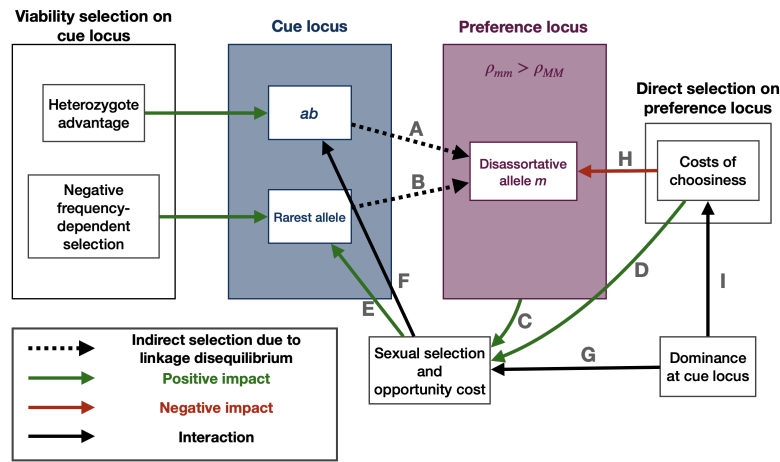

Figure 1: **Selective forces acting on cue and preference loci.** Dashed arrows represent indirect selection due to positive linkage disequilibrium between cue genotype and preference genotype. Green and red arrows represent the positive and negative impact respectively. Black arrows represent an impact that is either positive or negative (see manuscript for details). Disassortative allele is promoted by heterozygote advantage (A) and negative frequency-dependent viability selection (B) at the cue locus via indirect selection due to linkage disequilibrium. Disassortative mating triggers sexual selection on males (C) and opportunity costs on females due to a cost of choosiness (D) that generates negative frequency dependent sexual selection (E) and impacts the fitness of heterozygotes at the cue locus (F). Sexual selection often causes a disadvantage to heterozygotes at the cue locus hampering the fixation of disassortative mating. However the dominance relationship at cue locus impacts sexual selection (G). Under certain conditions sexual selection favors heterozygotes at the cue locus (C), promoting high levels of disassortative mating. The disassortative allele suffers from costs of choosiness (H). These costs depend on the dominance relationship at the cue locus (I).

on cue alleles (see arrows C and E in Fig. 1). The strength of this sexual selection then  
310 depends on the average strength of disassortative preference ( $\bar{\rho}$ ). Disassortative mating  
also generates a relative cost of choosiness on females (see arrow D in Fig. 1). Similarly to  
312 sexual selection, this cost especially disfavors females displaying a common phenotype  
because these females tend to prefer males with rare phenotype.

314 Sexual selection and relative cost of choosiness also tightly depend on dominance  
at the cue locus  $C$ . When  $h_a \neq 0$  (departure from co-dominance), the evolutionary  
316 fate of alleles is strongly influenced by their dominance. When heterozygotes are fre-  
quent at locus  $C$ , *i.e.* when allele  $a$  is neither rare or common ( $P_{ho}^{HW} - 2P_{he}^{HW} < 0$  or  
318  $p_a \in (0.21, 0.79)$ , see details in Appendix A), allele  $a$  is favored when recessive ( $h_a < 0$ ),  
because  $aa$  homozygotes then display the rarest phenotype and therefore benefit from  
320 an improved reproductive success. By contrast, when heterozygotes are rare at locus  $C$   
( $2P_{he}^{HW} - P_{ho}^{HW} < 0$ ), allele  $a$  is favored when dominant ( $h_a > 0$ ). Indeed, when allele  $a$  is  
322 rare ( $p_a < 0.21$ ),  $bb$  individuals are numerous and preferentially mate with individuals  
displaying the phenotype encoded by allele  $a$  (the rare phenotype). Therefore, when  $a$   
324 is dominant,  $ab$  individuals benefit from a greater mating success than  $bb$  individuals,  
thereby increasing the frequency of allele  $a$ . When the cue allele  $a$  is common ( $p_a > 0.79$ ),  
326 the dominance of allele  $a$  limits the reproductive success of the few remaining heterozy-  
gotes  $ab$  displaying the frequent phenotype shared with homozygotes  $aa$ , which leads to  
328 the gradual elimination of the alternative allele  $b$ .

These conclusions are drawn from the QLE approximation, and are relevant for mod-  
330 erate levels of disassortative mating (low values of  $\rho$ ). Stronger levels of disassortative  
mating may lead to contrasted outcomes, because some crosses (e.g.  $aa \times aa$ ) will occur  
332 at very low frequency.

## *Evolutionary fate of disassortative mating mutants*

334 To understand the conditions enabling the evolution of disassortative mating, we now  
 approximate the change in frequency of the mutant allele  $m$  at the preference locus  $P$ , as-  
 336 sociated with an increased level of disassortative preference as compared to the resident  
 allele  $M$ . The QLE analysis highlights that the evolution of disassortative mating de-  
 338 pends on (1) the heterozygote advantage, (2) the genetic variation at the cue locus  $C$ , and  
 (3) the costs of choosiness, described by the terms  $\Delta^{he} p_m$ ,  $\Delta^C p_m$  and  $\Delta^{cost} p_m$  respectively.  
 340 Assuming that  $\epsilon$  is small, we get (see Eq. (B3a) in (Otto et al., 2008)):

$$\Delta p_m = \Delta^{he} p_m + \Delta^C p_m + \Delta^{cost} p_m + O(\epsilon^3). \quad (12)$$

342 In the following sections we define these three terms and dissect the evolutionary mech-  
 anisms acting on preference alleles.

### 344 *Disassortative mating is promoted by heterozygote advantage at the cue locus*

The impact of heterozygote advantage on the frequency of the mate choice allele  $m$  is  
 346 given by:

$$\Delta^{he} p_m = D_{he,m} H, \quad (13)$$

348 where  $D_{he,m}$  (see (15)) is the trigenic disequilibrium describing the association between  
 the mutant  $m$  at the mate choice locus  $P$  and heterozygotes at the cue locus  $C$  and  $H$   
 350 is the heterozygote advantage at the cue locus  $C$  (see (14)). The fitness advantage of  
 heterozygotes  $H$  can be influenced by both viability and sexual selections, as detailed  
 352 below:

$$H = \underbrace{2S_{ab}(f) - S_{aa}(f) - S_{bb}(f)}_{\text{Viability selection acting on cues } (H_{ns})} + \underbrace{\frac{1}{2}(p_a^2 H_{aa} + 2p_a p_b H_{ab} + p_b^2 H_{bb})}_{\text{Sexual selection acting on cues } (H_{ss})}. \quad (14)$$

354 The sexual selection promoting heterozygotes at the cue locus  $C$  depends on mate  
 preferences for heterozygotes over homozygotes expressed by the different genotypes  
 356  $i \in \mathcal{G}_C$  at locus  $C$  ( $H_i$ ):

$$H_i = 2Pref(\bar{\rho})_{i,ab} - Pref(\bar{\rho})_{i,aa} - Pref(\bar{\rho})_{i,bb}.$$

358 The effect of heterozygote advantage at the cue locus  $C$  on the disassortative mating  
 allele  $m$  is then modulated by the association between the mutant  $m$  and heterozygotes  
 360 at the cue locus (i.e. the trigenic disequilibrium  $D_{he,m}$ ), as described by Eq. (13). At QLE,  
 the trigenic disequilibrium satisfies:

$$362 \quad D_{he,m} = \frac{1}{2}D_P\Delta D_{he} + O(\epsilon^2), \quad (15)$$

where  $D_{he}$  is the excess of heterozygotes at locus  $C$  due to allele  $m$  and  $D_P = p_M p_m$  is the  
 364 genetic diversity at locus  $P$ .

The trigenic disequilibrium depends on the change in the excess of heterozygotes  
 366 due to allele  $m$  following a single round of mating. This change depends on (1) the  
 fraction of homozygotes at the cue locus  $C$ , determined by allele frequencies ( $p_a$  and  $p_b$ )  
 368 and dominance relationships ( $h_a$ ) and (2) the increase in disassortative preferences in the  
 population  $\Delta_\rho$  (Eq. (16)).

$$370 \quad \Delta D_{he} = D_C^2 \Delta_\rho (P_{ho}^{HW} + h_a(p_b - p_a)) + O(\epsilon^2). \quad (16)$$

The increase in disassortative preferences  $\Delta_\rho$  depends on the effect of the mutant  $m$  at  
 372 the preference locus  $P$  and its frequency (Eq. (17)).

$$\Delta_\rho = p_m(\rho_{mm} - \rho_{Mm}) + p_M(\rho_{Mm} - \rho_{MM}). \quad (17)$$

374 The change  $\Delta D_{he}$  has the same sign than the increase in disassortative preferences  $\Delta_\rho$   
 (see Appendix A for details). As the mutant  $m$  increases the strength of disassortative

376 preferences (*i.e.*  $\rho_{mm} > \rho_{MM}$ ),  $\Delta D_{he} > 0$ , meaning that individuals with disassortative  
preferences tend to produce more heterozygotes at locus *C*. As a consequence, mutant  
378 alleles *m*, increasing disassortative preferences, are preferentially associated with het-  
erozygotes at the cue locus *C*. The disassortative mutant *m* is thus promoted when  
380 viability and sexual selections both favor heterozygotes at the mating cue locus *C* (see  
arrow A in Fig. 1). This contrasts with the assortative mating model of Otto et al. (2008),  
382 where the assortative allele is preferentially associated with homozygotes at cue locus,  
suggesting that assortative mating can be promoted when homozygotes are favored.

384 Dominance relationships affect the change in the frequency of heterozygotes. For  
instance when a rare cue allele is dominant, a round of moderate disassortative mating  
386 (*i.e.*  $\rho_{MM}$  and  $\rho_{mm}$  are small) produces more heterozygotes than when the cue allele is  
recessive, because the expression of the rare mating cue in heterozygotes is promoted by  
388 disassortative mate preferences.

*Sexual selection produced by disassortative mating generates a heterozygote disadvantage*  
390 *limiting the evolution of such a behavior*

As described above, the disassortative alleles *m* tend to be preferentially associated with  
392 heterozygotes at locus *C*. Because *ab* heterozygotes with disassortative preferences (*i.e.*  
carrying a *m* allele) mate preferentially with either of the *aa* or *bb* homozygotes (depend-  
394 ing on the dominance relationship), the evolution of disassortative preferences is likely  
to generate a sexual selection disfavoring heterozygotes at locus *C*. This mechanism may  
396 hamper the fixation of allele *m* and may limit the evolution of disassortative mating in  
natural populations. This effect is determined by the mating success of heterozygotes at

398 locus C. From Eq. (14), this sexual selection term can be written as:

$$H_{ss} = \bar{\rho} \left( -\frac{P_{he}^{HW}}{2} + \frac{h_a}{2}(p_b - p_a) \right). \quad (18)$$

400 Sexual selection on heterozygotes depends on the strength of disassortative mating ( $\bar{\rho}$ ),  
the allele frequencies at locus C ( $p_a$  and  $p_b$ ) and the dominance of allele a ( $h_a$ ). Assuming  
402 codominance at cue locus ( $h_a = 0$ ), sexual selection always disfavors heterozygotes at  
the cue locus (see arrow F in Fig. 1). The more common disassortative preferences  
404 are in the population, the higher this sexual selection acting against heterozygotes is.  
Since the disassortative allele  $m$  is preferentially associated with heterozygotes at cue  
406 locus, it suffers from sexual selection caused by disassortative mating. The spread of a  
disassortative allele is thus limited by this negative feedback.

408 However, the sexual selection acting against heterozygotes at the cue locus depends  
on the dominance relationship at the cue locus (see arrow G in Fig. 1). Assuming strict  
410 dominance at the cue locus ( $h_a = -1$  or  $h_a = 1$ ), heterozygous individuals are indistin-  
guishable from homozygotes, therefore modifying the proportion of phenotypes in the  
412 population. Heterozygote advantage at the cue locus due to sexual selection increases  
when the most common allele is recessive: when allele  $a$  is recessive and common het-  
414 erozygous males  $ab$  have the same phenotype as homozygotes  $bb$ .  $ab$  males then display  
the rarest phenotype and benefit from negative frequency-dependent selection. When  
416 the dominant cue allele is sufficiently rare, sexual selection favors heterozygotes (see Ap-  
pendix A), generating a positive feedback loop favoring the evolution of disassortative  
418 mating (see arrow F in Fig. 1). However, this effect should often be transient because  
negative frequency-dependent sexual selection rapidly balances phenotypic cue frequen-  
420 cies. In the general case where allele frequencies are balanced at the cue locus, sexual  
selection is thus expected to limit the evolution of disassortative mating.

422 Sexual selection also impacts the evolution of assortative mating (Otto et al., 2008),  
where the assortative allele is preferentially associated with homozygotes at the cue  
424 locus. Similarly to disassortative mating, sexual selection is often thought to limit the  
evolution of assortative mating. However homozygote disadvantage due to assortative  
426 mating decreases with the proportion of homozygotes in the population. Assortative  
mating promotes homozygotes, this preference may thus suffer from a weak negative  
428 feedback loop, in contrast with the evolution of disassortative mating.

*Disassortative preferences are favored when the rarer allele is promoted*

430 The change in the frequency of cue alleles impacts the evolution of preference alleles.  
This impact is described by the term:

$$432 \quad \Delta^C p_m = (D_{am} + D_{a,m}) \frac{\Delta p_a}{D_C}. \quad (19)$$

As highlighted in Eq. (19), the invasion of a disassortative mutant  $m$  depends on its link-  
434 age with the cue allele  $a$  (either in *cis* or in *trans*, described by  $D_{am}$  and  $D_{a,m}$  respectively)  
and on the variation in the frequency of allele  $a$  ( $\Delta p_a$ ). If allele  $m$  is associated with allele  
436  $a$ , the frequency of allele  $m$  increases with the rise of frequency of allele  $a$ . The QLE  
approximates the *cis* and *trans* linkage disequilibria between the mutant allele  $m$  and the  
438 cue allele  $a$  as:

$$D_{am} = D_{a,m} + O(\epsilon^2) = \frac{D_P D_C}{2} \Delta \rho((p_b^A - p_a^A) + \frac{h_a}{2} (P_{ho}^{HW} - P_{he}^{HW})) + O(\epsilon^2). \quad (20)$$

440  $D_{am}$  and  $D_{a,m}$  have the same sign as  $p_b - p_a$  (see Appendix A for more details), thus  $D_{am}$   
and  $D_{a,m}$  are positive (resp. negative), when allele  $a$  is the rarer (resp. most common).  
442 Contrary to assortative alleles preferentially associated with the most common cue allele  
(Otto et al., 2008), Eq. (20) indicates that the disassortative mating allele  $m$  tends to be

444 linked with the rarer allele at locus C. This predicts that disassortative mating is likely  
to emerge when viability selection on the cue provides fitness benefit to rare alleles (see  
446 arrow D in Fig. 1), while assortative mating is promoted when the most common cue  
alleles are favored.

448 Disassortative allele  $m$  also tends to be more tightly linked either to the dominant cue  
allele when the frequency of homozygotes is high, or to the recessive allele when the  
450 frequency of heterozygotes is high (*i.e.* when  $\frac{h_a}{2}(P_{ho}^{HW} - P_{he}^{HW}) \geq 0$ ), increasing the associa-  
tion between alleles  $a$  and  $m$ ). The effect of dominance can thus modulate the association  
452 between allele  $m$  and the rarer cue allele.

Given that (1) the disassortative allele  $m$  is associated with the rarer cue allele and  
454 (2) disassortative mating promotes the rarer allele via sexual selection, the disassortative  
mating allele  $m$  could benefit from a positive feedback loop promoting the evolution of  
456 disassortative mating. However, negative frequency-dependent sexual selection rapidly  
increases the frequency of the initially rare allele, limiting the spread of the  $m$  allele in the  
458 population. The initially rarer allele may become as common as the other allele breaking  
the linkage disequilibrium between allele  $m$  and alleles at cue locus. Thus this positive  
460 effect of sexual selection on the evolution of disassortative mating could be broken with  
the increase of the initially rarer allele frequency.

#### 462 *The costs of choosiness limit the fixation of disassortative mating*

The evolution of mate preferences is generally limited by the costs associated with choosi-  
464 ness. Eq. (21) shows that both fixed and relative costs of choosiness indeed limit the  
fixation of the disassortative mutant  $m$  (see arrow H in Fig. 1):

$$466 \quad \Delta^{cost} p_m = -\frac{\Delta_p}{2} D_P \left( c_f + c_r \left( mate_0 + \frac{1}{2} mate_1 + \frac{h_a}{2} (mate_1^a - mate_1^b) \right) \right) \quad (21)$$



where  $mate_i, i \in \{0, 1\}$  and  $mate_1^\alpha, \alpha \in \{a, b\}$  describe the proportion of mating partners sharing different numbers of alleles (see Eq. (22) and (24)). The costs of choosiness disfavor preference alleles increasing disassortative choices (i.e. when  $\rho_{mm} > \rho_{MM}$ ) (see Appendix A for details). The relative cost of choosiness then crucially depends on the proportion of preferred mates. This effect can be captured by the parameters  $mate_k, k \in \{0, 1\}$  representing the probability that a female encounters a male differing by  $k$  allele at locus  $C$  at the Hardy-Weinberg equilibrium:

$$mate_0 = p_a^2 p_a^2 + 2p_a p_b 2p_a p_b + p_b^2 p_b^2, \quad (22)$$

$$mate_1 = p_a^2 (2p_a p_b) + 2p_a p_b (p_a^2 + p_b^2) + p_b^2 (2p_a p_b). \quad (23)$$

The mating between individuals differing by zero ( $mate_0$ ) or one cue allele ( $mate_1$ ) may be partially avoided when individuals have a disassortative preference, resulting in a cost  $c_r$  for the choosy female that may fail to find a suitable male. The term  $mate_0 + \frac{1}{2}mate_1$  is minimal when  $p_a = p_b$ , so that the impact of the relative cost of choosiness is weaker when the cue alleles are in similar proportions in the population, maximizing the opportunities for females to find a male displaying the preferred cue. The dominance at the cue locus  $C$  then modulates the crosses at the Hardy-Weinberg equilibrium between individuals carrying at least one allele  $a$  ( $mate_1^a$ ) and between individuals carrying at least one allele  $b$  ( $mate_1^b$ )

$$mate_1^a = p_a^2 (2p_a p_b) + 2p_a p_b (p_a^2), \quad (24)$$

$$mate_1^b = p_b^2 (2p_a p_b) + 2p_a p_b (p_b^2). \quad (25)$$

When  $a$  is dominant ( $h_a > 0$ ), matings between individuals sharing at least one allele  $a$  ( $mate_1^a$ ) are limited by disassortative preference, leading to an increased cost of choosiness. By contrast, matings between individuals sharing at least one allele  $b$  ( $mate_1^b$ ) are

492 promoted by disassortative preference, therefore limiting the cost of choosiness. The  
difference between  $mate_1^a$  and  $mate_1^b$  is thus crucial to understand the impact of the dom-  
494 inance relationship at locus  $C$  on the cost of choosiness. This difference is given by:

$$496 \quad mate_1^a - mate_1^b = 4p_a p_b (p_a - p_b). \quad (26)$$

Thus when  $a$  is dominant ( $h_a > 0$ ), the relative cost of choosiness is limited when  
498 allele  $a$  is rare, because  $bb$  homozygotes will frequently meet  $ab$  heterozygotes displaying  
their preferred cue. Symmetrically, the cost of choosiness acting on the mutant allele  $m$   
500 is higher when the most common cue allele is dominant. The dominance relationship  
therefore influences the evolution of disassortative mating also by modulating the costs  
502 of choosiness (see arrow I in Fig. 1).

*Recombination rate does not impact the evolution of disassortative mating based on a*  
504 *matching rule*

The QLE approximation revealed no effect of the recombination rate  $r$  between cue and  
506 preference alleles, suggesting that it does not impact the evolution of disassortative mat-  
ing. Similarly, recombination does not impact the analytical results brought by QLE  
508 approach applied to the evolution of assortative mating (Otto et al., 2008). These two  
models assume mate preferences based on matching rule, *i.e.* that females use their own  
510 cue to choose their mate (Kopp et al., 2018). Under this assumption, a mutant allele  
 $m$  immediately translates into disassortative mating in any female carrying it, indepen-  
512 dently from her genotype at the cue locus. By contrast, assuming a trait/preference rule,  
*i.e.* when females choose their mate independently of their own cue, any preference al-  
514 lele in a female does not always generate a disassortative behaviour, depending on her

genotype at the cue locus. Under such a preference/trait hypothesis, the recombination  
516 rate would likely impact the evolution of disassortative preference.

### *Evolution of disassortative mating assuming strong overdominance at the 518 cue locus*

The QLE approximation allows to draw analytic approximations for the change in fre-  
520 quencies at both loci, assuming low levels of selection. Appendix B shows that QLE  
approximations are relevant when the parameters  $S_i(f, h_a)$  for all  $(i, f, h_a) \in \mathcal{G}_C \times \mathcal{F}_{C,P} \times$   
522  $[0, 1]$ ,  $\rho_i$  for all  $i \in \mathcal{G}_C$ ,  $c_r$  and  $c_f$  are small, but are not valid outside these conditions.  
Since, we could not perform a local stability analysis using analytical derivation, we run  
524 numerical simulations to study ecological situations where viability selection at the cue  
locus can be strong and/or marked mate preferences lead to high rate of disassortative  
526 mating.

Well-documented cases of disassortative mating in natural population present strong  
528 heterozygote advantage (Jay et al., 2019; Tuttle et al., 2016). We thus focus on the evo-  
lution of disassortative mating acting on a cue locus where strong overdominance is  
530 operating (Fig. 2).

#### *Disassortative mating is favored by asymmetrical overdominance*

532 Our simulations show that the difference between the fitness of heterozygotes and ho-  
mozygotes has a strong effect on the evolution of disassortative mate preferences (Fig.  
534 2(a) and 2(b)). Higher levels of disassortative mating are favored when heterozygotes at  
the cue locus are advantaged by viability selection (i.e. when homozygotes suffers from  
536 a significant genetic load  $\delta$ , Fig. 2(a) and 2(b)), consistent with the predictions brought by

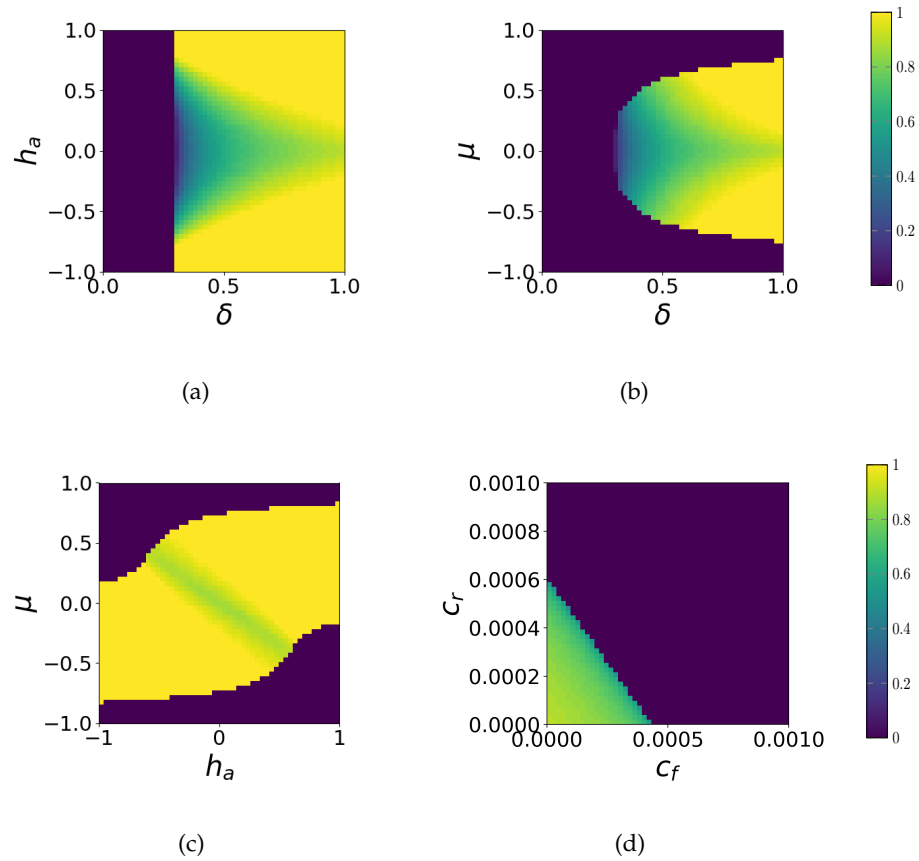

Figure 2: **Evolutionary stable level of strength of disassortative mating  $\rho$  acting on a cue locus submitted to overdominance.** We plotted the evolutionary stable level of strength of disassortative mating  $\rho$ . The effects of key parameters on the evolution of the disassortative mating acting on the cue loci submitted to overdominance are explored in the different panels: (a) Effect of fitness reduction in homozygotes  $\delta$  and of dominance coefficient at the cue locus  $C h_a$ , (b) Effect of fitness reduction in homozygotes  $\delta$  and asymmetry in this reduction on the two homozygotes  $\mu$ , (c) Effect of dominance coefficient at the cue locus  $C h_a$  and asymmetry in the fitness reduction on the two homozygotes  $\mu$  and (d) Effect of fixed cost of choosiness ( $c_f$ ) and relative cost of choosiness ( $c_r$ ). The default parameters values are as follows:  $h_a = h_m = 0, r = 0, \delta = 0.9, \mu = 0$  and  $c_r = c_f = 0.005$ .

the QLE approximation. Interestingly, higher levels of disassortative mating are favored  
538 when there is a moderate asymmetry ( $\mu$ ) in the negative selection acting on homozygotes  
at the cue locus, *i.e.* when one out of the two cue alleles is associated with a stronger  
540 genetic load (Fig. 2(b)). Selection indirectly acting on mating preference indeed crucially  
depends on genotypic frequencies at the cue locus  $C$ , which become unbalanced under  
542 asymmetrical selection. Unbalanced cue allele frequencies tend to increase the frequency  
of homozygotes compared to the frequency of heterozygotes, increasing the relative ad-  
544 vantage of heterozygotes due to viability selection, to sexual selection and to opportunity  
cost. As disassortative preference tends to be linked with heterozygotes, high levels of  
546 disassortative mating are favored by the unbalanced cue allele frequencies.

Because disassortative mating mutants are preferentially associated with the rare al-  
548 lele (carrying the recessive genetic load), once the asymmetrical selection against the  
rare allele is too strong, it prevents the emergence of the disassortative mating alleles  
550 associated with this maladaptive cue allele. When the negative viability selection on  
the rare allele is lower than a threshold, viability selection allows the emergence of the  
552 disassortative mating mutant and even favors the evolution of stronger levels of disassor-  
tative mating because as the level of disassortative behavior increases, the disadvantage  
554 of being associated with the rarer allele becomes weaker.

Asymmetrical overdominance therefore promotes the evolution of disassortative mat-  
556 ing preference, but only when the asymmetry in the genetic load associated with cue  
alleles is not too high.

558 *Interactions between dominance and fitness of cue alleles determine the evolution of dis-*  
*assortative mate preferences*

560 High levels of disassortative mating are favored when dominance relationships at the  
cue locus are strict (i.e. when allele  $a$  (resp.  $b$ ) is fully dominant to  $b$  ( $h_a = 1$ ) (resp.  
562  $a$  ( $h_a = -1$ )) as highlighted on Fig. 2(a). The dominant allele is disfavored by sexual  
selection generated by disassortative mating. When the dominant allele is rare the as-  
564 sociation of disassortative preference and cue heterozygosity increases, promoting high  
levels of disassortative mating. Moreover when the dominant allele is rare, the impact of  
566 the costs of choosiness on frequency changes is lower, further promoting high levels of  
disassortative mating.

568 When combining both effects leading to unbalanced cue allele frequencies (i.e. dom-  
inance and asymmetrical negative selection on cue alleles), we show that high levels of  
570 disassortative mating are strongly favored when the fitness reduction in homozygotes  
is associated with the dominant cue allele (Fig. 2(c)). This numerical result is consis-  
572 tent with the prediction drawn from the QLE approximation, because in this case, the  
dominant allele is in low frequency (because of both viability and sexual selections).

574 *The challenging evolution of disassortative mating*

Numerical simulations confirm that the evolution of disassortative mating is challeng-  
576 ing when moderate overdominance (enhancing the fitness of heterozygotes) is at play at  
the cue locus. In most cases, strict disassortative mating is not favored. The higher the  
578 disassortative preferences, the more sexual selection acts against heterozygotes. When  
heterozygote advantage is not strong enough, sexual selection caused by mating prefer-  
580 ences can overcome heterozygote advantage, favoring intermediate level of disassortative

mating (see green areas on Fig. 2(a) and 2(b)). By contrast, when viability selection pro-  
582 duces strong heterozygote advantage ( $\delta$  is high) that can compensate sexual selection,  
complete disassortative preferences can be fixed (see Fig. 2(a) and 2(b)).

584 The costs of choosiness may further limit the evolution of the disassortative mutant.  
Fig. 2(d) shows that disassortative mating is under positive selection only when the costs  
586 of choosiness are limited (at least inferior to 0.03).

## Discussion

588 *Predicted selection regimes promoting disassortative mating match*  
*empirical observations*

590 Our results show that disassortative mating is promoted either (1) when heterozygotes  
at cue locus are in average fitter than homozygotes or (2) when viability selection on  
592 cue favors the rarest cue allele. These selection regimes promoting disassortative mating  
are opposed to the selection regimes promoting assortative mating, such as homozygote  
594 advantage at cue locus or viability selection on cue favoring the most common allele  
(Otto et al., 2008) (see Table 2).

596 Interestingly, our simulations also show that higher levels of disassortative mating  
are promoted when one cue allele is dominant. The dominance relationship can indeed  
598 decrease sexual selection and relative cost of choosiness impairing the evolution of dis-  
assortative preferences.

600 Simulations also highlight that higher levels of disassortative mating are promoted  
when the dominant allele is disfavored when homozygous. This effect is consistent with  
602 the observed cases of disassortative mating. For instance the butterfly *H. numata* displays

a strong disassortative mating based on wing-pattern phenotype (in a tetrad experiment,  
604 3/4 of the realized crosses were involving disassortative pairs) (Chouteau et al., 2017).

In this species, the variation in wing-pattern morphs is controlled by a supergene with  
606 three main haplotypes (Joron et al., 2011). The dominant haplotypes are associated with  
a low survival of homozygous larvae (Jay et al., 2019). This case of disassortative mating  
608 seems to gather the conditions pinpointed by our model to enable the evolution of higher  
levels of disassortative mating.

610 Similarly, in the white-throated sparrow *Zonotrichia albicollis* an almost strict disassor-  
tative mating based on plumage morphs (*white* or *tan*) has been reported (Throneycroft,  
612 1975). Two supergene haplotypes, here referred to as *t* and *w*, control this variation in  
plumage coloration. Individuals with *tt* genotype have a *tan* coloration whereas indi-  
614 viduals carrying *tw* and *ww* genotypes have a *white* coloration. However the dominant  
haplotype *w* is associated with strong genetic load, generating homozygote disadvantage  
616 in *ww* individuals (Tuttle et al., 2016). Individuals with *white* coloration may be advan-  
taged over *tan* individuals because they invest less into parental care (Knapp and Falls,  
618 1983), generating an advantage of heterozygotes *tw* over homozygotes *tt*. Here the domi-  
nant cue allele is again associated with a strong disadvantage when homozygous, which,  
620 according to our results, strongly favors the emergence of disassortative preferences (see  
Fig 3).

622 *Polymorphism at the mating cue has a crucial effect on the evolution of*  
*disassortative mating*

624 The number of mating cues within the population is an important parameter in the evo-  
lution of mate preference (Otto et al., 2008), because it modulates the opportunity costs



|                                                             | Present model studying the evolution of disassortative mating                                                                                                                                                 | Otto et al. (2008) model studying the evolution of assortative mating                                                                                                                             |
|-------------------------------------------------------------|---------------------------------------------------------------------------------------------------------------------------------------------------------------------------------------------------------------|---------------------------------------------------------------------------------------------------------------------------------------------------------------------------------------------------|
| Viability selection on mating cue that promotes preferences | Heterozygotes advantage<br><br>Negative frequency-dependent viability selection                                                                                                                               | Homozygotes advantage<br><br>Positive frequency-dependent viability selection                                                                                                                     |
| Sexual selection on mating cue due to preferences           | Is expected to disadvantage heterozygotes unless when one type of homozygote is common and heterozygotes display the same mating cue as rare homozygotes<br><br>Negative frequency-dependent sexual selection | Is expected to disadvantage homozygotes unless when females sufficiently reject males differing by one cue allele and homozygotes are common<br><br>Positive frequency-dependent sexual selection |
| Relative cost of choosiness                                 | Lower when one type of homozygote is common and heterozygotes display the same mating cue as rare homozygotes                                                                                                 | Lower when one type of homozygote is common                                                                                                                                                       |

Table 2: Comparison between the evolution of disassortative mating based on the present study and the evolution of assortative mating based on Otto et al. (2008)'s study.

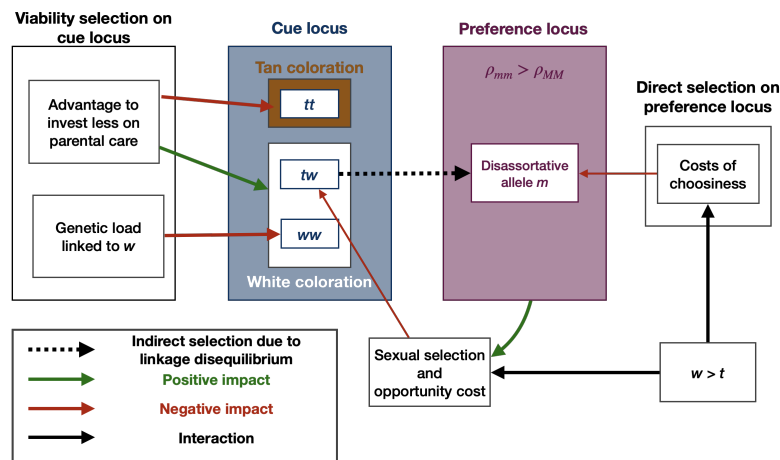

Figure 3: Selective forces acting on cue loci in the example of the white-throated sparrow (*Zonotrichia albicollis*). See Figure 1 for details of the meaning of symbols.

626 generated by choosiness. In our model, we consider only two cue alleles, generating at  
 628 most three different cue phenotypes in the population (phenotypes displayed by individ-  
 630 uals *aa*, *ab* and *bb*). With a higher number of alleles, the number of phenotypes would  
 632 be greater. Under disassortative mating, these phenotypes should have their frequen-  
 634 cies balanced by negative frequency-dependent selection. Thus both females and males  
 would still have sufficient mating opportunities, weakening the relative cost of choosi-  
 ness and sexual selection. Then disassortative mating should evolve more easily when  
 the number of mating cue is higher. This may have favored the evolution of disassorta-  
 tive preference targeting MHC loci, where multiple alleles are maintained by selection  
 (de Vries, 1989).

636 When the mating cue is a quantitative trait (e.g. size-related preferences, (Janicke  
 et al., 2019; Jiang et al., 2013)), variations within populations may be considered as mul-  
 638 tiple cues, depending on the discrimination rules of the choosy partners. If quantitative

variations are perceived as multiple differentiated phenotypes, it would probably promote the evolution of disassortative mating, in a similar manner as high level of discrete polymorphism.

The number of mating cues maintained within a population can also be increased via contacts between populations. The effect of immigration of individuals displaying alternative cues on the evolution of disassortative mating will then depend on viability selection. Cotto and Servedio (2017), show that the contact between populations promotes higher level of assortative mating, because individuals adapted to different habitats produces intermediate offspring maladaptive in each habitat. Contacts between locally adapted populations may thus limit the evolution of disassortative mating because it generates viability selection against hybrids, disfavoring such preferences.

Mating opportunities also depend on the distribution of cues in the population. A more balanced cue distribution within population often increases the negative effect of sexual selection on the evolution of assortative preferences (Otto et al., 2008). For instance, migration between populations has been shown to limit the evolution of further assortative mating because it promotes a more balanced polymorphism within populations and therefore increases the negative effect of sexual selection (Servedio, 2011). Similarly, migration between populations may limit the evolution of disassortative mating, because the resulting more balanced polymorphism increases the negative sexual selection.

*Negative feedback in the evolution of disassortative mating contrasts with  
660 the evolution of assortative mating*

A striking result from our analyses stems from the role of sexual selection generated  
662 by disassortative preferences on its evolution, which contrasts with the evolutionary dy-  
namics of assortative mating. Our results confirm that the sexual selection generated  
664 by disassortative mating often limits its own spread, as already mentioned by Nuis-  
mer et al. (2008). Indeed, the disassortative mating allele is generally associated with  
666 heterozygotes at the cue locus. Individuals with such allelic combinations tend to pref-  
erentially mate with homozygotes, generating sexual selection disfavoring heterozygotes  
668 at the cue locus. However, this sexual selection acting against heterozygotes depends on  
the distribution of cue allele frequency (see more details in Tab. 2).

670 Similarly, the evolution of assortative mating is thought to be limited by sexual se-  
lection (Otto et al., 2008) (but sexual selection can promote the evolution of assortative  
672 mating in some cases, see more details in Tab. 2). However, this negative effect of sexual  
selection decreases when the proportion of homozygotes at the cue locus is high. As-  
674 sortative mating usually produces more homozygotes than random mating: a decrease  
in the level of heterozygosity at the cue locus is thus expected when assortative pref-  
676 erences are spreading within a population. During the evolution of assortative mating,  
the negative effect of sexual selection on the evolution of assortative mating decreases  
678 as the proportion of homozygote increases. The evolution of disassortative mating may  
therefore be more severely impaired by sexual selection than the evolution of assortative  
680 mating.

Hence, favorable conditions for disassortative preferences may result in intermediate

682 values of choosiness in the population. In two meta-analyses (Janicke et al. (2019); Jiang  
et al. (2013)) covering 1,116 and 1,447 measures of strength of assortment respectively,  
684 most of the values corresponding to disassortative mating range from  $-0.5$  to  $0$  (but  
see below exception), suggesting that intermediate values of strength of disassortative  
686 mating are frequently observed. By contrast, most values corresponding to assortative  
mating behavior range from  $0$  to  $1$ , suggesting that the evolution of strict assortative  
688 mating is observed in a wide range of organisms.

*Alternative genetic architectures of mate preferences may limit the  
690 evolution of disassortative mating*

The genetic architecture of preference may also have an impact on the evolution of dis-  
692 assortative mating. Theoretical studies on the evolution of assortative mating usually  
rely on two main types of matching rules Kopp et al. (2018): (1) when mate choice of  
694 an individual depends on its own phenotype (*matching rule*) and (2) when preference is  
independent from the phenotype of the chooser (*preference/trait rule*). The evolution of  
696 assortative mating is strongly promoted either when assuming the *matching rule*, or when  
the cue and *preference/trait* loci are tightly linked (Kopp et al., 2018). Here, our results on  
698 the evolution of disassortative mating are obtained assuming a *matching rule*, and we ex-  
pect that assuming a *preference/trait rule* might limit such an evolution, because selection  
700 might break the unmatching allelic combinations. In the specific case of polymorphic  
mimicry, Maisonneuve et al. (2019) showed that under *preference/trait rule*, disassortative  
702 mating can emerge only if the preference and the cue loci are fully linked.

Moreover, here we only consider a single choosy sex. However, when both sexes  
704 are choosy (Servedio and Lande, 2006), the positive selection on the evolution of mate

preference in one sex may be relaxed when strong mate preferences are fixed in the  
706 other sex (Aubier et al., 2019). Drift then leads to periodic cycles where male and female  
alternatively become the most choosy sex (Aubier et al., 2019).

## 708 *Conclusions*

Our analytical and numerical results provide a general theoretical framework establish-  
710 ing the conditions enabling the evolution of disassortative mating. Our results pinpoint  
two selective regimes on mating cue that promote disassortative mating through indirect  
712 selection : heterozygote advantage and negative frequency-dependent selection. We also  
observe that disassortative mating generates sexual selection that often hamper its own  
714 fixation, leading to intermediate level of disassortative mating. This sexual selection de-  
pends on the dominance at the cue locus: if one type of homozygote at the cue locus  
716 is common and if heterozygotes display the same cue as the rare homozygote, sexual  
selection promotes the evolution of disassortative mating. We also show that this con-  
718 dition reduces the costs associated with choosiness. Interestingly, the favorable selective  
conditions predicted by our model match with two well-characterized cases of strong  
720 disassortative mating.

## Literature Cited

- 722 Aubier, T. G., Kokko, H., and Joron, M. (2019). Coevolution of male and female mate  
choice can destabilize reproductive isolation. Nature Communications, 10(1):5122.
- 724 Backwell, P. R. Y. and Passmore, N. I. (1996). Time constraints and multiple choice

- criteria in the sampling behaviour and mate choice of the fiddler crab, *uca annulipes*.  
726 Behavioral Ecology and Sociobiology, 38(6):407–416.
- Bank, C., Hermisson, J., and Kirkpatrick, M. (2012). Can reinforcement complete specia-  
728 tion? Evolution, 66(1):229–239.
- Barrett, S. C. (1990). The evolution and adaptive significance of heterostyly. Trends in  
730 Ecology & Evolution, 5(5):144 – 148.
- Barton, N. H. and Turelli, M. (1991). Natural and sexual selection on many loci. Genetics,  
732 127(1):229–255.
- Brooks, R. and Couldridge, V. (1999). Multiple sexual ornaments coevolve with multiple  
734 mating preferences. The American Naturalist, 154(1):37–45. PMID: 29587499.
- Byers, J., Wiseman, P., Jones, L., and Roffe, T. (2005). A large cost of female mate sampling  
736 in pronghorn. The American Naturalist, 166(6):661–668. PMID: 16475083.
- Byers, J. A. and Waits, L. (2006). Good genes sexual selection in nature. Proceedings of  
738 the National Academy of Sciences, 103(44):16343–16345.
- Chouteau, M., Llaurens, V., Piron-Prunier, F., and Joron, M. (2017). Polymorphism at a  
740 mimicry supergene maintained by opposing frequency-dependent selection pressures.  
Proceedings of the National Academy of Sciences, 114(31):8325–8329.
- 742 Cisar, C. R. (1999). Mating system of the filamentous ascomycete, *glomerella cingulata*.  
Current Genetics.
- 744 Cotto, O. and Servedio, M. R. (2017). The roles of sexual and viability selection in the evo-

- lution of incomplete reproductive isolation: From allopatry to sympatry. The American  
746 Naturalist, 190(5):680–693. PMID: 29053357.
- de Cara, M. A. R., Barton, N. H., Kirkpatrick, M., Lenormand, A. E. T., and Whitlock, E.  
748 M. C. (2008). A model for the evolution of assortative mating. The American Naturalist,  
171(5):580–596.
- 750 de Vries, R. R. P. (1989). Biological Significance of the MHC, pages 6–12. Springer  
Netherlands, Dordrecht.
- 752 Dieckmann, U. (2004). Adaptive Speciation. Cambridge Studies in Adaptive Dynamics.  
Cambridge University Press.
- 754 Drickamer, L. C., Gowaty, P. A., and Holmes, C. M. (2000). Free female mate choice  
in house mice affects reproductive success and offspring viability and performance.  
756 Animal Behaviour, 59(2):371 – 378.
- Ewens, W. J. (1979). Mathematical Population Genetics I. Theoretical Introduction.  
758 Springer, New York, NY.
- Falk, C. T. and Li, C. C. (1969). Negative assortative mating: Exact solution to a simple  
760 model. Genetics.
- Fisher, R. A. (1930). The genetical theory of natural selection. The Clarendon Press,  
762 Oxford.
- Gavrilets, S. (2004). Fitness Landscapes and the Origin of Species (MPB-41). Princeton  
764 University Press.



- 766 Gavrillets, S. and Boake, C. (1998). On the evolution of premating isolation after a founder  
event. The American Naturalist, 152(5):706–716. PMID: 18811345.
- 768 Gomulkiewicz, R. S. and Hastings, A. (1990). Ploidy and evolution by sexual selection:  
A comparison of haploid and diploid female choice models near fixation equilibria.  
Evolution, 44(4):757–770.
- 770 Grace, J. L. and Shaw, K. L. (2011). Coevolution of male mating signal and female  
preference during early lineage divergence of the hawaiian cricket, *laupala cerasina*.  
772 Evolution, 65(8):2184–2196.
- 774 Greenspoon, P. B. and M’Gonigle, L. K. (2014). Host–parasite interactions and the evolu-  
tion of nonrandom mating. Evolution, 68(12):3570–3580.
- 776 Greenspoon, P. B. and Otto, S. P. (2009). Evolution by fisherian sexual selection in  
diploids. Evolution, 63(4):1076–1083.
- 778 Heisler, I. L. (1984). A quantitative genetic model for the origin of mating preferences.  
Evolution, 38(6):1283–1295.
- 780 Heisler, I. L. (1985). Quantitative genetic models of female choice based on “arbi-  
trary” male characters. Heredity, 55(2):187–198.
- 782 Higginson, D. M., Miller, K. B., Segraves, K. A., and Pitnick, S. (2012). Female reproduc-  
tive tract form drives the evolution of complex sperm morphology. Proceedings of the  
National Academy of Sciences, 109(12):4538–4543.
- 784 Hiscock, S. J. and McInnis, S. M. (2003). Pollen recognition and rejection during the  
sporophytic self-incompatibility response: Brassica and beyond. Trends in Plant  
786 Science, 8(12):606 – 613.

- Howard, R. S. and Lively, C. M. (2003). Opposites attract? mate choice for parasite evasion and the evolutionary stability of sex. Journal of Evolutionary Biology, 16(4):681–689.
- Howard, R. S. and Lively, C. M. (2004). Good vs complementary genes for parasite resistance and the evolution of mate choice. BMC Evolutionary Biology, 4(1):48.
- Hughes, N. K., Kelley, J. L., and Banks, P. B. (2012). Dangerous liaisons: the predation risks of receiving social signals. Ecology Letters, 15(11):1326–1339.
- Ihara, Y. and Feldman, M. W. (2003). Evolution of disassortative and assortative mating preferences based on imprinting. Theoretical Population Biology, 64(2):193 – 200.
- Janicke, T., Marie-Orleach, L., Aubier, T. G., Perrier, C., and Morrow, E. H. (2019). Assortative mating in animals and its role for speciation. The American Naturalist, 194(6):865–875. PMID: 31738105.
- Jay, P., Chouteau, M., Whibley, A., Bastide, H., Llaurens, V., Parrinello, H., and Joron, M. (2019). Mutation accumulation in chromosomal inversions maintains wing pattern polymorphism in a butterfly. bioRxiv.
- Jiang, Y., Bolnick, D. I., and Kirkpatrick, M. (2013). Assortative mating in animals. The American Naturalist, 181(6):E125–E138. PMID: 23669548.
- Jiggins, C. D., Naisbit, R. E., Coe, R. L., and Mallet, J. (2001). Reproductive isolation caused by colour pattern mimicry. Nature, 411(6835):302–305.
- Joron, M., Frezal, L., Jones, R. T., Chamberlain, N. L., Lee, S. F., Haag, C. R., Whibley, A., Becuwe, M., Baxter, S. W., Ferguson, L., Wilkinson, P. A., Salazar, C., Davidson,

- 808 C., Clark, R., Quail, M. A., Beasley, H., Glithero, R., Lloyd, C., Sims, S., Jones, M. C.,  
Rogers, J., Jiggins, C. D., and French Constant, R. H. (2011). Chromosomal rear-  
810 rangements maintain a polymorphic supergene controlling butterfly mimicry. Nature,  
477(7363):203–206.
- 812 Karlin, S. and Feldman, M. W. (1968). Further analysis of negative assortative mating.  
Genetics.
- 814 Kirkpatrick, M. (1982). Sexual selection and the evolution of female choice. Evolution,  
36(1):1–12.
- 816 Kirkpatrick, M. (2000). Reinforcement and divergence under assortative mat-  
ing. Proceedings of the Royal Society of London. Series B: Biological Sciences,  
818 267(1453):1649–1655.
- Kirkpatrick, M. and Nuismer, S. L. (2004). Sexual selection can constrain sympatric  
820 speciation. Proceedings of the Royal Society of London. Series B: Biological Sciences,  
271(1540):687–693.
- 822 Kirkpatrick, M. and Ravigné, V. (2002). Speciation by natural and sexual selection: Mod-  
els and experiments. The American Naturalist, 159(S3):S22–S35.
- 824 Knapton, R. W. and Falls, J. B. (1983). Differences in parental contribution among  
pair types in the polymorphic white-throated sparrow. Canadian Journal of Zoology,  
826 61(6):1288–1292.
- Kondrashov, A. S. and Shpak, M. (1998). On the origin of species by means of assortative  
828 mating. Proceedings. Biological sciences, 265(1412):2273–2278.

- Kopp, M. and Hermisson, J. (2008). Competitive speciation and costs of choosiness.  
830 Journal of Evolutionary Biology, 21(4):1005–1023.
- Kopp, M., Servedio, M. R., Mendelson, T. C., Safran, R. J., Rodríguez, R. L., Hauber, M. E.,  
832 Scordato, E. C., Symes, L. B., Balakrishnan, C. N., Zonana, D. M., and van Doorn, G. S.  
(2018). Mechanisms of assortative mating in speciation with gene flow: Connecting  
834 theory and empirical research. The American Naturalist, 191(1):1–20. PMID: 29244561.
- Kruijt, J. P. and Hogan, J. A. (1967). Social Behavior on the Lek in Black Grouse, *Lyrurus*  
836 *Tetrix Tetrax* (L.). Ardea, 55(1–2):204 – 240.
- Lande, R. (1981). Models of speciation by sexual selection on polygenic traits.  
838 Proceedings of the National Academy of Sciences, 78(6):3721–3725.
- Maisonneuve, L., Joron, M., Chouteau, M., and Llaurens, V. (2019). Evolution and genetic  
840 architecture of disassortative mating at a locus under heterozygote advantage. bioRxiv.
- Merrill, R. M., Chia, A., and Nadeau, N. J. (2014). Divergent warning patterns contribute  
842 to assortative mating between incipient heliconius species. Ecology and Evolution,  
4(7):911–917.
- 844 Miller, G. T. and Pitnick, S. (2002). Sperm-female coevolution in drosophila. Science,  
298(5596):1230–1233.
- 846 Nuismer, S. L., Otto, S. P., and Blanquart, F. (2008). When do host–parasite interactions  
drive the evolution of non-random mating? Ecology Letters, 11(9):937–946.
- 848 O’Donald, P. (1980a). Genetic models of sexual and natural selection in monogamous  
organisms. Heredity, 44(3):391–415.

- 850 O'Donald, P. (1980b). Genetic models of sexual selection. Cambridge University Press.
- Otto, S. P. (1991). On evolution under sexual and viability selection: A two-locus diploid  
852 model. Evolution, 45(6):1443–1457.
- Otto, S. P., Servedio, M. R., and Nuismer, S. L. (2008). Frequency-dependent selection  
854 and the evolution of assortative mating. Genetics, 179(4):2091–2112.
- Penn, D. J. and Potts, W. K. (1999). The evolution of mating preferences and major  
856 histocompatibility complex genes. The American Naturalist, 153(2):145–164. PMID:  
29578757.
- 858 Petrie, M. (1994). Improved growth and survival of offspring of peacocks with more  
elaborate trains. Nature, 371(6498):598–599.
- 860 Piertney, S. B. and Oliver, M. K. (2006). The evolutionary ecology of the major histocom-  
patibility complex. Heredity, 96(1):7–21.
- 862 Pomiankowski, A. (1987). The costs of choice in sexual selection. Journal of Theoretical  
Biology, 128(2):195 – 218.
- 864 Pruitt, J. N. and Riechert, S. E. (2009). Male mating preference is associated with risk of  
pre-copulatory cannibalism in a socially polymorphic spider. Behavioral Ecology and  
866 Sociobiology, 63(11):1573–1580.
- Rosenthal, G. G. (2017). Mate choice : the evolution of sexual decision making from  
868 microbes to humans. Princeton University Press.
- Sacca, G. (1964). Comparative bionomics in the genus musca. Annual Review of  
870 Entomology, 9(1):341–358.

- Savolainen, V., Anstett, M.-C., Lexer, C., Hutton, I., Clarkson, J. J., Norup, M. V., Powell,  
872 M. P., Springate, D., Salamin, N., and Baker, W. J. (2006). Sympatric speciation in palms  
on an oceanic island. Nature, 441:210–2013.
- 874 Schneider, K. A. and Bürger, R. (2006). Does competitive divergence occur if assortative  
mating is costly? Journal of Evolutionary Biology, 19(2):570–588.
- 876 Servedio, M. R. (2011). Limits to the evolution of assortative mating by female choice  
under restricted gene flow. Proceedings: Biological Sciences, 278(1703):179–187.
- 878 Servedio, M. R. and Lande, R. (2006). Population genetic models of male and mutual  
mate choice. Evolution, 60(4):674–685.
- 880 Sheldon, B. C., Merilö, J., Qvarnström, A., Gustafsson, L., and Ellegren, H. (1997). Pa-  
ternal genetic contribution to offspring condition predicted by size of male secondary  
882 sexual character. Proceedings of the Royal Society of London. Series B: Biological  
Sciences, 264(1380):297–302.
- 884 Slade, R. W. and McCallum, H. I. (1992). Overdominant vs. frequency-dependent selec-  
tion at mhc loci. Genetics, 132(3):861–864. 1468635[pmid].
- 886 Smith, C. C. and Mueller, U. G. (2015). Sexual transmission of beneficial microbes. Trends  
in Ecology & Evolution, 30(8):438 – 440.
- 888 Thronycroft, H. B. (1975). A cytogenetic study of the white-throated sparrow,  
zonotrichia albicollis (gmelin). Evolution, 29(4):611–621.
- 890 Tuttle, E. M., Bergland, A. O., Korody, M. L., Brewer, M. S., Newhouse, D. J., Minx, P.,  
Stager, M., Betuel, A., Cheviron, Z. A., Warren, W. C., Gonser, R. A., and Balakrish-

892 nan, C. N. (2016). Divergence and functional degradation of a sex chromosome-like  
supergene. Current Biology, 26(3):344–350.

894 Veller, C., Muralidhar, P., and Haig, D. (2020). On the logic of fisherian sexual selection\*.  
Evolution, 74(7):1234–1245.

896 Wagner, W. E. (2011). Chapter 6 - direct benefits and the evolution of female mating  
preferences: Conceptual problems, potential solutions, and a field cricket. volume 43  
898 of Advances in the Study of Behavior, pages 273 – 319. Academic Press.

Wedekind, C., Seebeck, T., Bettens, F., and Paepke, A. J. (1995). Mhc-dependent  
900 mate preferences in humans. Proceedings of the Royal Society of London. Series B:  
Biological Sciences, 260(1359):245–249.

902 Welch, A. M., Semlitsch, R. D., and Gerhardt, H. C. (1998). Call duration as an indicator  
of genetic quality in male gray tree frogs. Science, 280(5371):1928–1930.

904

## Appendix A: Details of analytic results

We study the evolution of alleles frequencies in a two locus diploid model. One locus  
 906 controls the mating cue (with two alleles  $a$  and  $b$ ) and the other controls mate preference  
 (with two alleles  $M$  and  $m$ ). The model is described in the main file. We used a QLE  
 908 analysis to approximate the changes in frequency of the cue allele  $a$  and of the preference  
 allele  $m$  (see main file for more details). Here, we detail how our analytic results pinpoint  
 910 some mechanisms explained in the main file.

*The dominance relationship at cue locus impacts the action of sexual selection in a way  
 912 depending on the proportion of heterozygotes*

The approximation of the change in frequency of the cue allele  $a$  using QLE analysis is  
 914 given by:

$$\Delta p_a = D_C \left( p_a(S_{aa}(f, h_a) - S_{ab}(f, h_a)) + p_b(S_{ab}(f, h_a) - S_{bb}(f, h_a)) \right) \\
 916 + \bar{\rho}(1 + c_r) D_C \left( \frac{p_b^4 - p_a^4}{4} + \frac{h_a}{2} (P_{ho}^{HW} - 2P_{he}^{HW}) \right) + O(\epsilon^2),$$

918 where we recall that under the QLE approximation,  $\epsilon$  is a small quantity.

Here we aim to study the impact of the dominance relationship on the variation of  
 920 allele  $a$  frequency. We therefore study the sign of the term

$$A := \frac{h_a}{2} (P_{ho}^{HW} - 2P_{he}^{HW}),$$

922 describing the effect of the dominance relationship. As  $P_{he}^{HW} + P_{ho}^{HW} = 1$  by definition we  
 have:

$$924 \quad A = \frac{h_a}{2} (1 - 3P_{he}^{HW}).$$



Thus  $A > 0$  when  $a$  is partially dominant ( $h_a > 0$ ) (resp. recessive ( $h_a < 0$ ) and the  
 926 proportion of heterozygotes is lower (resp. higher) than  $1/3$ . This entails that when the  
 proportion of heterozygotes is low (resp. high), the dominant (resp. recessive) cue allele  
 928 is favored.

The condition on  $P_{he}^{HW}$  translates in a condition on  $p_a$  as follows:

$$\begin{aligned}
 930 \quad P_{he}^{HW} > 1/3 &\iff 2p_a p_b > 1/3 \\
 &\iff 6p_a(1 - p_a) - 1 > 0 \\
 932 \quad &\iff p_a \in \left(\frac{3 - \sqrt{3}}{6}, \frac{3 + \sqrt{3}}{6}\right).
 \end{aligned}$$

934 For the sake of readability we use in the manuscript the approximation  $\frac{3 - \sqrt{3}}{6} = 0.21$   
 and  $\frac{3 + \sqrt{3}}{6} = 0.79$ .

### 936 *Disassortative preference promotes heterozygote excess at cue locus*

We develop the expression of the change of excess of heterozygotes at cue locus due to  
 938 the preference allele  $m$ ,  $\Delta D_{he}$ :

$$\Delta D_{he} = D_C^2 \Delta \rho (p_a^2 + p_b^2 + \frac{h_a}{2}(p_b - p_a)) + O(\epsilon^2).$$

940 Thus  $\Delta D_{he}$  depends on the sign of the term  $p_a^2 + p_b^2 + \frac{h_a}{2}(p_b - p_a)$ . But the latter can be  
 written as follows:

$$\begin{aligned}
 942 \quad p_a^2 + p_b^2 + \frac{h_a}{2}(p_b - p_a) &= p_a^2 + (1 - p_a)^2 + \frac{h_a}{2}(1 - 2p_a), \\
 944 \quad &= 2p_a^2 - (2 + h_a)p_a + \frac{2 + h_a}{2}.
 \end{aligned}$$

946 This term is a quadratic function in  $p_a$ . The value of its discriminant is:

$$\Delta = h_a^2 - 4 < 0,$$

948 which entails that this quadratic function is always positive, and that  $\Delta D_{he}$  has the same  
sign as  $\Delta\rho$ . Hence, when allele  $m$  is associated with higher disassortative preference ( $\Delta\rho$ )  
950 it promotes heterozygote excess.

*Sexual selection generated by disassortative mating can favor or disfavor*

952 *heterozygotes at cue locus.*

The heterozygote advantage due to sexual selection is given by:

954

$$H_{ss} = \bar{\rho} \left( -\frac{P_{he}^{HW}}{2} + \frac{h_a}{2}(p_b - p_a) \right).$$

956

To study the impact of sexual selection on heterozygotes we look at the sign of  
958  $-\frac{P_{he}^{HW}}{2} + \frac{h_a}{2}(p_b - p_a)$ . The latter can be written as follows:

$$\begin{aligned} -\frac{P_{he}^{HW}}{2} + \frac{h_a}{2}(p_b - p_a) &= -p_a(1 - p_a) + \frac{h_a}{2}(1 - 2p_a), \\ &= p_a^2 - (1 + h_a)p_a + \frac{h_a}{2}. \end{aligned}$$

960

962 It is a quadratic function in  $p_a$  with discriminant:

$$\Delta = (1 + h_a)^2 - 2h_a = 1 + h_a^2 > 0.$$

964

Therefore  $H_{ss}$  is equal to

$$(p_a - (1 + h_a - \sqrt{1 + h_a^2})/2)(p_a - (1 + h_a + \sqrt{1 + h_a^2})/2).$$

When there is codominance at cue locus (*i.e.*  $h_a = 0$ ), we have  $H_{ss} = -\bar{p}p_a(1 - p_a) \leq 0$ ,  
 966 thus disassortative preference always disfavor heterozygotes at cue locus. A classical  
 functional study yields that  $(1 + h_a - \sqrt{1 + h_a^2})/2$  belongs to  $[-1, 1]$  and has the sign of  
 968  $h_a$ , and that  $(1 + h_a + \sqrt{1 + h_a^2})/2$  belongs to  $[0, 1]$ . As a consequence when  $h_a \neq 0$ ,  $H_{ss}$   
 can be either positive or negative depending on the frequency of allele  $p_a$ . Therefore  
 970 when the dominance relationship is unbalanced, sexual selection due to disassortative  
 mating may favor or disfavor heterozygotes at cue locus.

972 *Mutant allele m is always associated with the rarer cue allele.*

The associations between allele  $m$  and cue alleles are given by the *cis* ( $D_{am}$ ) and *trans*  
 974 ( $D_{a,m}$ ) linkage disequilibria. At QLE these linkages can be approximate by:

$$976 \quad D_{am} = D_{a,m} + O(\epsilon^2) = \frac{D_p D_C}{2} \Delta\rho((p_b^4 - p_a^4) + \frac{h_a}{2}(P_{ho}^{HW} - P_{he}^{HW})) + O(\epsilon^2).$$

978 To understand the association between allele  $m$  and cue alleles we have to look at the  
 sign of  $(p_b^4 - p_a^4) + \frac{h_a}{2}(P_{ho}^{HW} - P_{he}^{HW})$ . But the latter can be written as follows:

980

$$\begin{aligned} (p_b^4 - p_a^4) + \frac{h_a}{2}(P_{ho}^{HW} - P_{he}^{HW}) &= (p_b^2 + p_a^2)(p_b^2 - p_a^2) + \frac{h_a}{2}(p_a^2 + p_b^2 - 2p_a p_b), \\ 982 \quad &= (p_b^2 + p_a^2)(p_b - p_a) + \frac{h_a}{2}(1 - 4p_a p_b), \\ &= (2p_a^2 - 2p_a + 1)(1 - 2p_a) + \frac{h_a}{2}(2p_a - 1)^2, \\ 984 \quad &= (2p_a - 1) \left( -(2p_a^2 - 2p_a + 1) + \frac{h_a}{2}(2p_a - 1) \right), \\ 986 \quad &= (2p_a - 1) \left( -2p_a^2 + (2 + h_a)p_a - 1 - \frac{h_a}{2} \right) =: (2p_a - 1)Q[p_a]. \end{aligned}$$

where  $Q$  is a quadratic function, with discriminant:

$$\Delta = (2 + h_a)^2 - 4(2 + h_a) = h_a^2 - 4 < 0.$$

It entails that  $Q$  is always negative, and that  $D_{am}$  and  $D_{a,m}$  have the sign of  $1 - 2p_a$  (i.e.  $p_b - p_a$ ). As a consequence preference allele  $m$  is associated with the rarer allele at cue locus at QLE.

*Costs of choosiness penalize the preference allele associated with higher levels of disassortative mating*

Here we study the impact of the costs of choosiness on frequencies of preference alleles.

We recall that the impact of the costs of choosiness on allele  $m$  frequency is given by:

$$-\frac{\Delta\rho}{2}D_P\left(c_f + c_r\left(mate_0 + \frac{1}{2}mate_1 + \frac{h_a}{2}(mate_1^b - mate_1^a)\right)\right).$$

We are interested in the sign of the term  $B$  defined by:

$$\begin{aligned} B &:= mate_0 + \frac{1}{2}mate_1 + \frac{h_a}{2}(mate_1^b - mate_1^a) \\ &= (p_a^4 + 4p_a^2p_b^2 + p_b^4) + 2p_ap_b((1 - h_a)p_a^2 + (1 + h_a)p_b^2). \end{aligned}$$

$B$  is this the sum of two positive terms. Hence when  $\Delta\rho$  is positive (i.e. when  $\rho_{mm} > \rho_{MM}$ ), the costs of choosiness penalize the preference allele associated with higher disassortative preferences.

## Appendix B: Comparison of QLE analysis results with numerical simulations

1006

We used a QLE analysis to draw analytic approximations for the changes in frequencies at the cue and preference loci ( $\Delta p_a$  and  $\Delta p_m$ ). The results of the QLE analysis are only relevant when for all  $(i, f, h_a) \in \mathcal{G}_C \times \mathcal{F}_{C,P} \times [0, 1]$  (where we recall that  $\mathcal{F}_{C,P}$  denotes the space of frequencies on  $\mathcal{G}_C \times \mathcal{G}_P$ ),  $S_i(f, h_a) = O(\epsilon)$ ; for all  $k$  in  $\mathcal{G}_P$ ,  $\rho_k = O(\epsilon)$ ,  $c_r = O(\epsilon)$  and  $c_f = O(\epsilon)$  with  $\epsilon$  small.

1012

To illustrate that the QLE results provide a good approximation under the QLE hypothesis, we then compare the values of the frequency changes predicted by the QLE analysis ( $\Delta^{QLE} p_a$  and  $\Delta^{QLE} p_m$ ) with values from numerical simulations ( $\Delta^{num} p_a$  and  $\Delta^{num} p_m$ ). We define  $Err\Delta p_a = \left| \frac{\Delta^{QLE} p_a - \Delta^{num} p_a}{\Delta^{num} p_a} \right|$  and  $Err\Delta p_m = \left| \frac{\Delta^{QLE} p_m - \Delta^{num} p_m}{\Delta^{num} p_m} \right|$  to quantify the error of the QLE approximation. We assume that the viability selection does not depend on the frequencies distribution and of the dominance at cue locus. Then for all  $i \in \mathcal{G}_C$ ,  $S_i(f, h_a) = S_i$ . The results are plotted in Figures B1 and B2 and show that the error of the QLE approximations are low when the hypotheses of the QLE are satisfied *i.e.* the parameters  $S_{aa}$ ,  $S_{ab}$ ,  $S_{bb}$ ,  $\rho_{MM}$ ,  $\rho_{mM}$ ,  $\rho_{mm}$ ,  $c_r$  and  $c_f$  are small.

1020

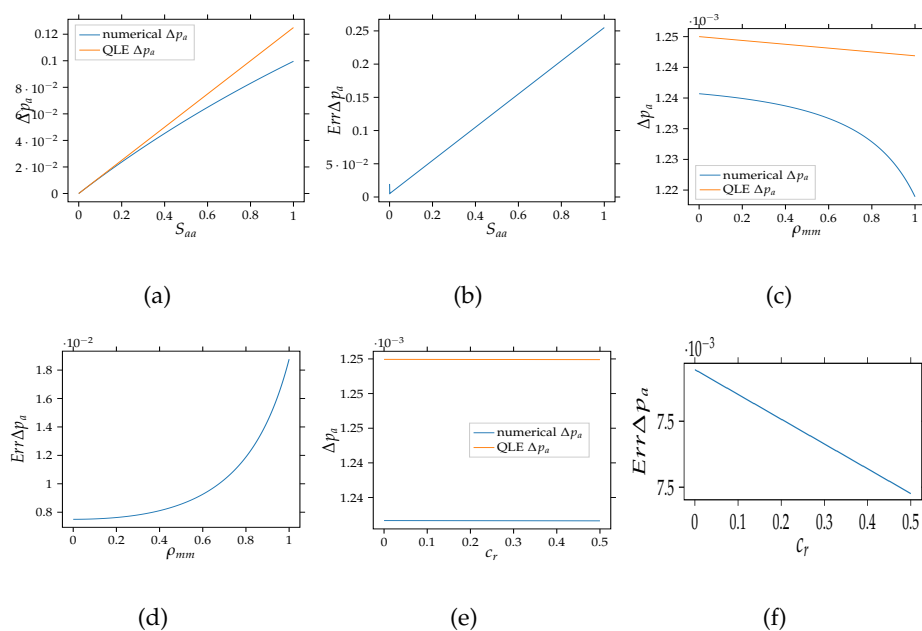

**Figure B1: Change of allele  $a$  frequency at cue locus ( $\Delta$ ) after the introduction of mutant predicted by the QLE analysis (orange lines) and by numerical simulations (blue lines).** The effect of key parameters on the evolution of the disassortative mating is explored in the different panels: (a)(b) Effect of the viability selection acting on homozygote  $aa$  at cue locus ( $S_{aa}$ ), (c)(d) Effect of the strength of disassortative mating within an individual of genotype  $mm$  at preference locus ( $\rho_{mm}$ ), (e)(f) Effect of the relative cost of choosiness ( $c_r$ ). The default parameters values are as follows:  $\rho_{MM} = 0$ ,  $\rho_{mm} = 0.01$ ,  $h_a = 1$ ,  $h_m = -1$ ,  $r = 0.1$ ,  $c_r = 0$ ,  $c_f = 0$ ,  $S_{aa} = 0$ ,  $S_{ab} = 0.01$  and  $S_{bb} = 0$ .

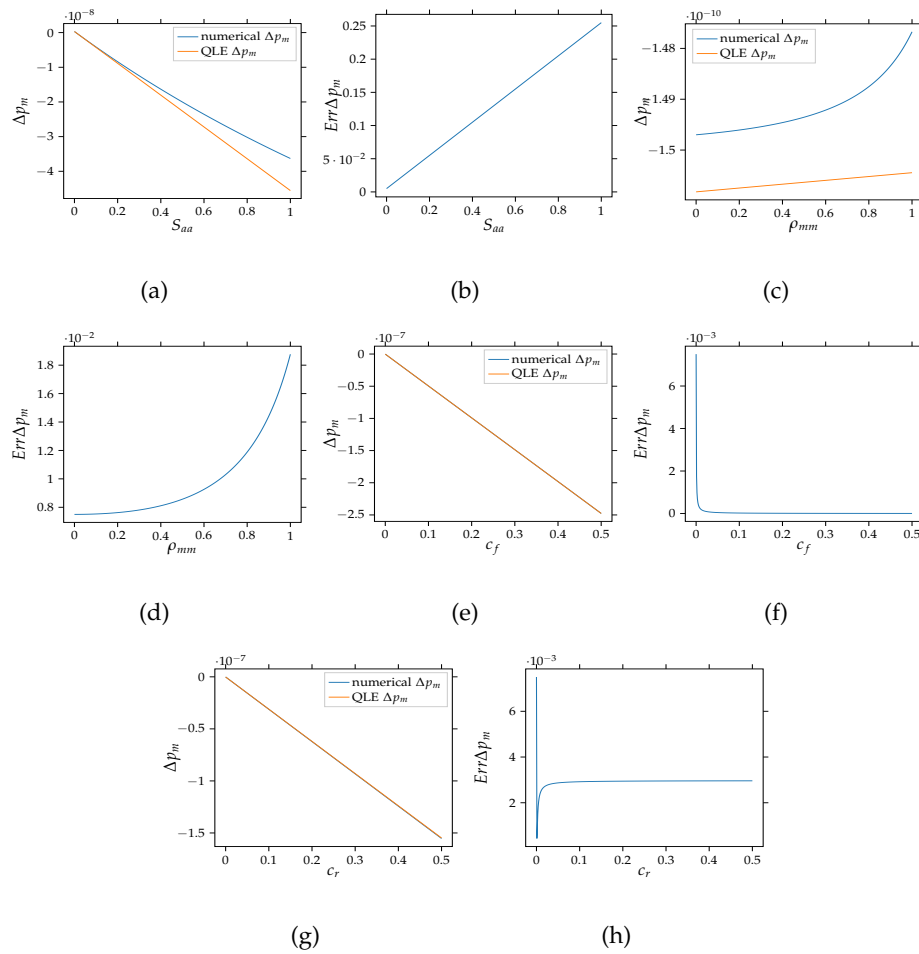

**Figure B2: Change of allele  $m$  frequency at preference locus ( $\Delta p_m$ ) after the introduction of the mutant predicted by the QLE analysis (orange lines) and by numerical simulations (blue lines).** The effect of key parameters on the evolution of the disassortative mating is explored in the different panels: (a)(b) Effect of the viability selection acting on homozygote  $aa$  at cue locus ( $S_{aa}$ ), (c)(d) Effect of the strength of disassortative mating within an individual of genotype  $mm$  at preference locus ( $\rho_{mm}$ ), (e)(f) Effect of the fixed cost of choosiness ( $c_f$ ), (g)(h) Effect of the relative cost of choosiness ( $c_r$ ). The default parameters values are as follows:  $\rho_{MM} = 0$ ,  $\rho_{mm} = 0.01$ ,  $h_a = 1$ ,  $h_m = -1$ ,  $r = 0.1$ ,  $c_r = 0$ ,  $c_f = 0$ ,  $S_{aa} = 0$ ,  $S_{ab} = 0.01$  and  $S_{bb} = 0$ .
